# 1 Learning the fitness dynamics of pathogens from phylogenies

## 2 3 **Authors:**

4 Noémie Lefrancq<sup>1,2\*</sup>, Loréna Duret<sup>1</sup>, Valérie Bouchez<sup>3,4</sup>, Sylvain Brisse<sup>3,4</sup>, Julian Parkhill<sup>2,+</sup>, Henrik  
5 Salje<sup>1,+</sup>

## 6 7 **Affiliations:**

- 8 1. Department of Genetics, University of Cambridge, Cambridge, UK
- 9 2. Department of Veterinary Medicine, University of Cambridge, Cambridge, UK
- 10 3. Institut Pasteur, Université de Paris, Biodiversity and Epidemiology of Bacterial Pathogens,  
11 Paris, France
- 12 4. National Reference Center for Whooping Cough and Other Bordetella Infections, Paris, France

13  
14 + Joint senior authors

15 \* Corresponding author. Email: [ncmjl2@cam.ac.uk](mailto:ncmjl2@cam.ac.uk)

## 16 17 **Abstract**

18 The dynamics of pathogen genetic diversity, including the emergence of lineages with increased  
19 fitness, is a foundational concept of disease ecology with key public health implications. However, the  
20 identification of distinct lineages and estimation of associated fitness remain challenging, and are  
21 rarely done outside densely sampled systems. Here, we present a scalable framework that summarizes  
22 changes in population composition in phylogenies, allowing for the automatic detection of lineages  
23 based on shared fitness and evolutionary relationships. We apply our approach to a broad set of  
24 viruses and bacteria (SARS-CoV-2, H3N2 influenza, *Bordetella pertussis* and *Mycobacterium*  
25 *tuberculosis*) and identify previously undiscovered lineages, as well as specific amino acid changes  
26 linked to fitness changes, the findings of which are robust to uneven and limited observation. This  
27 widely-applicable framework provides an avenue to monitor evolution in real-time to support public  
28 health action and explore fundamental drivers of pathogen fitness.

## 29 30 **One sentence summary**

31 Using an agnostic framework we shed light on changes in population composition in phylogenetic  
32 trees, allowing for the automatic detection of circulating lineages and estimation of fitness dynamics.

### 33 **Main text**

34 For most pathogens, there are constantly changing patterns of strain composition. Pressures to evade  
35 host immunity, environmental shifts or changing abilities to infect and disseminate in hosts result in  
36 the emergence of some lineages and the extinction of others. These dynamic patterns of genetic  
37 diversity are a fundamental aspect of disease ecology. They also have potentially critical public health  
38 implications, including signifying immune or vaccine escape or improved transmissibility. It has,  
39 however, been difficult to identify and quantify lineages with differential levels of fitness, especially  
40 outside highly genetically sampled pathogen systems such as SARS-CoV-2 or influenza(1–3).  
41 Identifying lineages with improved fitness would allow focused public health response, through e.g.,  
42 targeted vaccination, as well as provide key insights into the underlying ecology of disease systems.

43 Existing methods to monitor the fitness of strains at the population level mostly rely on *a priori*  
44 lineage definitions, for example, Pango lineages(4) or Nextstrain Clades(5), the global clades for  
45 influenza(6), or strains defined by pre-determined single mutations for *Bordetella pertussis*(7). Strain  
46 fitness can be estimated using models that capture the changing proportion of individual lineages  
47 through time, typically with multinomial logistic models. These models are computationally efficient  
48 and provide key insights, for example, to track the effect of amino-acid substitutions(8), or vaccine  
49 implementation(3, 9) on fitness. However, these approaches rely on an ability to group individual  
50 sequences into different lineages, which is usually based on consensus opinion, arbitrary thresholds  
51 in amino acid difference and importantly, unlinked to underlying differences in fitness. This is  
52 problematic as it means we are not reliably capturing emergent lineages with increased fitness.

53 Phylogenetic tree-based methods provide an alternative strategy to uncover strain fitness.  
54 Strains with increased fitness will transmit more frequently, leading to a higher branching rate in the  
55 phylogeny and more sampled descendants. The fitness of lineages can therefore be inferred from their  
56 branching pattern in a phylogeny using phylodynamic approaches such as birth-death models(10).  
57 Multi-type birth-death models extend this idea by allowing the birth and death rate of lineages, and  
58 thereby fitness, to depend on a lineage's state or type, which may be known (e.g. genotype,  
59 mutations(11, 12)) or inferred(13). However, these models are computationally challenging to run,  
60 especially given the large amount of data now being generated. They are also susceptible to sampling  
61 biases in both space and time, which are common in phylogenetic analyses. There are alternative  
62 approaches that focus on the broad population structure(14) or changes in effective population  
63 size(15) but are not able to capture lineage fitness. Other works(2, 10, 16) have been done at a more  
64 granular level, but do not allow for a broad understanding of fitness changes through time.

65 Here we present a novel agnostic framework that summarizes the changes in population  
66 composition in phylogenetic trees through time, allowing for the automatic detection of circulating  
67 lineages based on differences in fitness, which we quantify and link back to specific amino acid  
68 changes. We apply this approach to SARS-CoV-2, influenza H3N2, *Bordetella pertussis* (*B. pertussis*)  
69 and *Mycobacterium tuberculosis* (*M. tuberculosis*). We selected these respiratory pathogens as they  
70 present a diverse set of viruses and bacteria at both local and global scales, and include both well-  
71 studied and understudied threats to human health. Taking each pathogen in turn, we use our novel  
72 analytical framework to make critical insights into the set of discrete lineages circulating over time,  
73 their individual fitness, as well as the genomic changes linked to quantified shifts in fitness.

74  
75 **Tracking population composition in timed phylogenetic trees.** Our framework builds on a genetic  
76 distance-based index that measures the epidemic success of each node (internal or terminal) in a time-  
77 resolved phylogeny (Figure 1A)(16). This measure is based on the expectation that nodes sampled

78 from an emerging fitter lineage will be phylogenetically closer than the rest of the population at that  
79 time. The index of each node is derived from the distance distribution from that node to all other  
80 nodes that circulate at that time, weighted by a kernel with a set timescale. This weight allows us to  
81 track lineage emergence dynamically, focusing on short distances between nodes (containing  
82 information about recent population dynamics) rather than long distances (containing information  
83 about past evolution). The timescale is tailored to the specific pathogen studied and its choice will  
84 depend on the molecular signal, as well as the transmission rate. Using the principles of coalescent  
85 theory in structured populations(17–19), we derive the expected index dynamics through time in the  
86 case of an emerging successful lineage (Figure 1A, derivation in Supplementary Material). The  
87 dynamics of this index summarize changes in the composition of populations over time, linked to  
88 fitness at the population level (Figure 1B-E and S1).

89  
90 **Agnostic identification of pathogen lineages.** We developed a tree partitioning algorithm using  
91 generalized additive models that finds the set of lineages that best explains the index dynamics (Figure  
92 1B-E and S2). We assessed the generality of our approach across viruses and bacteria by analyzing four  
93 pathogens: SARS-CoV-2 (N=3129 global whole genome sequences), influenza H3N2 (N=1476 global  
94 hemagglutinin [HA] sequences), *B. pertussis* (N=1248 whole genome sequences from France) and *M.*  
95 *tuberculosis* (N=998 whole genome sequences from Samara, Russia(20)). All four are respiratory  
96 pathogens whose spread and fitness have been previously studied using genomic data. We found that  
97 our framework was able to capture the lineage dynamics of each pathogen considered (Figure 1B-E).  
98 Using this framework on SARS-CoV-2 worldwide, we agnostically tracked the changes in population  
99 composition (Figure 1B), with each main variant of concern having a clear change in index dynamics.  
100 Further, we found that our framework was able to capture population changes for the variety of  
101 pathogens considered. Clade replacement was tracked in the influenza H3N2 time-resolved worldwide  
102 phylogeny (Figure 1C), despite the gene marker length being small (1698 bp). Going beyond RNA  
103 viruses, we tested our model on two bacteria, *B. pertussis* in France and *M. tuberculosis* in Samara,  
104 Russia, with largely different diversity and time scales (Figure 1D-E). In both cases, our framework was  
105 able to track changes in the population composition, allowing us to refine the *a priori*-defined lineages.  
106 Our framework provides an insightful summary of the changes in population structure, by only  
107 following the index dynamics.

108  
109 **Pathogen lineages agnostically identified in the context of previous studies.** For each pathogen, we  
110 explored how our automatic classification relates to previously identified lineages (Figure 2). We  
111 computed the Adjusted Rand-Index (ARI) to measure the agreement between classifications,  
112 accounting for random clustering(21). A value of 1 corresponds to perfect agreement with previously  
113 identified lineages, whereas a value of 0 would be expected if clusters were assigned at random.  
114 Overall, we found that our agnostic identification of lineages was in agreement with current  
115 classifications (mean ARI of 0.75 across pathogens, min 0.62, max 0.94). The five SARS-CoV-2 variants  
116 of concern that spread globally were perfectly delineated by our framework (Alpha [B.1.1.7; 20I], Beta  
117 [B.1.351; 20H], Gamma [P.1.\*; 20J], Delta [B.1.617.2/AY.\*; 21A/21J], and Omicron [BA.1.1.529/BA.\*;  
118 21K])(22, 23), and the majority of sub-variants were correctly called as well (ARI = 0.80, Figure 2A). We  
119 noted that sub-variants that reached a maximum proportion of less than 5% in our global dataset were  
120 indistinguishable from others. This highlights the power of our framework in finding lineages that  
121 emerge at the geographical scale of the dataset, i.e. globally. Replicating the analysis to SARS-CoV-2  
122 datasets by continent, we re-identify the variants of interest that mainly spread within those

123 continents, e.g. Eta/B.1.525 in Africa, Mu/B.1.621 in the Americas and EU1 in Europe (Figure S3-4)(24–  
124 26). We found similar results for H3N2, with the global subclades being well-matched (ARI of 0.62).  
125 Our agnostic framework mainly differed from the existing classification when considering global clades  
126 at a very low frequency in our dataset (for example clades 1\*, only 2% of sequences). This further  
127 highlights that our framework is focusing on the broad population changes. *B. pertussis*'s population  
128 composition is less well-studied. To date, only a few clades have been reported, defined by changes  
129 in alleles of the promoter of the pertussis toxin (ptxP) and fimbriae 3 gene (fim3)(7). Our framework  
130 was able to find these major clades (ARI = 0.63). We further found three new lineages that emerged.  
131 These three lineages have clear distinct index dynamics (Figure 1D, pink, red and purple lineages), but  
132 have not been previously identified. Further, we recovered most of the known *M. tuberculosis* lineages  
133 and sublineages (ARI = 0.92). Specifically, the main global lineages were found(20, 27, 28), with the  
134 exception of the distinction between the Central Asian Strain (CAS) and East African Indian (EAI)  
135 lineages, which are both present in very small numbers in the dataset and therefore indistinguishable.  
136 The SNP-defined sub-lineages were mostly recovered(29), with some discrepancy in lineages such as  
137 Harleem, Ural and Latin American-Mediterranean (LAM), which can be attributed to the index focusing  
138 on signal of lineage expansion rather than a SNP definition. Therefore, our analysis was able to track  
139 the expansion of those lineages specifically in Samara, Russia, rather than the global sub-lineages that  
140 might have first expanded elsewhere. This highlights the granularity of our framework, which is able  
141 to track lineage expansion at a local level. To investigate how our framework compares to existing  
142 ones, we compared the (sub-)lineages in SARS-CoV-2, the pathogen system with the most well-  
143 characterized lineages, from our approach with that identified using fastbaps(14) and  
144 treestructure(15). We found that by specifically considering the fitness of the lineages, we could more  
145 consistently recover the known lineages (Figure S5).

146  
147 **Quantifying the fitness of each detected lineage.** We developed a multinomial logistic model that  
148 takes into account the birth of lineages to fit the proportion of each lineage through time and quantify  
149 their fitness. We assume each lineage has a constant fitness through time, defined as its relative  
150 growth rate in the population. By taking into account lineage emergence based on their Most Recent  
151 Common Ancestor (MRCA), our model does not estimate proportions for lineages that do not exist yet  
152 in the population, as opposed to implementations in other studies, e.g., (8). This simple model  
153 captured the lineage dynamics of each pathogen (Figure 3A-D and S6-9). We found that the underlying  
154 fitness of each emerging lineage was non-null, in line with the lineages called being indeed differently  
155 fit (Figure S10). We further computed the inferred real-time fitness of each lineage in the population.  
156 Indeed, while our model estimates a constant fitness parameter for each lineage, their actual fitness  
157 through time depends on what other lineages are circulating at that time. We found that the SARS-  
158 CoV-2 lineage 1, corresponding to Omicron XBB1.5, had the best maximal real-time fitness, followed  
159 by lineages 5 and 7, corresponding to Omicron BA.5 and BA.1 (Figure 3E, S10). H3N2 lineages' fitness  
160 was more homogeneous across the population, with lineages persisting on average 3.9 years after  
161 their emergence (Figure 3F, S10)(30, 31). For *B. pertussis*, our results are consistent with those of  
162 previous studies(3). However, we note that three lineages (labeled 1, 2 and 3) emerged following the  
163 implementation of a new acellular vaccine in France in 1998(32) (Figure 3G, S10). We found that these  
164 three lineages have the highest fitness of all *B. pertussis* strains, pointing towards a potential immune  
165 pressure on lineage dynamics from the new vaccine. *M. tuberculosis* lineage fitness was the most  
166 stable of the four pathogens explored, reflecting its long-lasting diverse population. The only  
167 exception is the comparatively recent emergence of lineages 1 and 2(20) (Figure 3H, S10). These

168 lineages are rising sharply in the population, and have a relative fitness per year of 1.0057,  
169 95%CI:[1.0055, 1.0060] and 1.00087, 95%CI:[1.00077, 1.00098], respectively.

170

171 **Lineage-defining mutations.** We explored whether specific changes in the genomes were linked to  
172 lineage fitness by identifying lineage-defining mutations (Figure 4). We defined such mutations as (i)  
173 present in at least 80% of the sequences in that lineage and (ii) not present in the ancestral lineage.  
174 While we focus on mutations, we note our framework is applicable to other covariates, both for the  
175 analysis of genotypes (e.g. indels, or gene gain/loss), or phenotype (e.g. resistance to antimicrobial  
176 drugs). For each pathogen, we looked at where those mutations are located in their genomes, and  
177 how functionally relevant each of them are. For SARS-CoV-2, we found that the highest density of  
178 lineage-defining amino-acid substitutions was located in the Receptor Binding Domain (RBD) of the  
179 spike protein, with low densities in ORF1a, ORF1b, and ORF10 (Figure 4A-E-I, S11, S12). Our lineage-  
180 defining mutations were consistent with those described in a previous analysis that estimated  
181 nucleotide positions linked with shifts in fitness across 6 million SARS-CoV-2 genomes(8). We found  
182 that our screening recovered the fittest mutations (Figure 4I). We obtained similar results with H3N2,  
183 for which most of the lineage-defining amino-acid substitutions are located in the HA1 domain (Figure  
184 4B-F-J, S13). We then investigated specifically if the mutations that we found were located in  
185 previously described antigenic sites(33). We found that indeed, the antigenic sites had the highest  
186 proportion of amino acid substitutions compared to the rest of the gene, and that within those, the  
187 Koel sites had the highest proportions of substitutions(34) (Figure 4J). Our framework also gave  
188 interesting results in *B. pertussis* and *M. tuberculosis*. We recovered the main previously-described  
189 pertussis lineage-defining mutations, namely in *ptxP* and *fim3* (Figure 4C-G-K). Further, we found a  
190 selection of other associated mutations that had not been previously described, with two distinct non-  
191 synonymous mutations in *sphB1* being of particular interest as they suggest parallel evolution (Figure  
192 S14). *sphB1* encodes a protease which is involved in the extracellular release of the pertussis  
193 filamentous haemagglutinin, a *B. pertussis* acellular vaccine antigen and key host-interaction  
194 factor(35). Overall, we found that virulence-associated genes had the highest proportion of lineage-  
195 defining mutations (Figure 4K). Lastly, we investigated the mutations associated with the most recent  
196 clades of *M. tuberculosis* (clades 1 and 2 from Figure 3H). As reported previously(20) we found that  
197 antimicrobial resistance-associated genes had the highest proportion of lineage-defining mutations  
198 (Figure 4D-H-L, S15).

199

200 **Tracking lineages in real-time.** Our framework enables us to track population composition changes  
201 through time, with a direct link to fitness. As our method relies on the estimation of the pairwise  
202 distance distribution for each node in a tree, the number of sequences does not impact the index  
203 dynamics, as long as sequences are representative of the diversity (Figure 5A). To demonstrate this  
204 robustness to sampling biases in time, we conducted a sensitivity analysis using the SARS-CoV-2  
205 dataset by repeatedly removing a subset of genomes, including in a temporally uneven manner, and  
206 re-estimated the circulating lineages each time. We found that our framework was still able to detect  
207 virtually all the lineages, even when using heavily biased datasets (Figure 5B, mean ARI of 0.90). Finally,  
208 we explored how fast after emergence our framework was able to detect lineages. We truncated our  
209 full global SARS-CoV-2 dataset every two weeks and reran the detection algorithm. We found that our  
210 model was able to capture each lineage, with a median delay of 2.2 months after emergence, with  
211 only 10 sequences required (Figure 5C). Considering that the SARS-CoV-2 dataset used in this study  
212 comes from NextStrain and was composed of only 3129 sequences (approximately 0.02% of all

213 sequences available on GISAID at the time of the study), the time to lineage identification could be  
214 further shortened.

215

216 **Conclusion.** In this study, we presented a novel framework that can agnostically track changes in  
217 population composition in phylogenetic trees, even in situations of heavily biased availability of  
218 sequences. Across a broad range of pathogens, we have shown we can recover the main known  
219 circulating lineages for each pathogen, as well as identify new, previously unknown lineages, with  
220 significant changes in fitness. We can quantify the relative fitness of each lineage and identify genetic  
221 changes linked to the emergence of new, fitter lineages. This framework can have important  
222 implications for public health surveillance. There is increased interest in the systematic sequencing of  
223 pathogens detected in healthcare settings. By integrating such sequencing efforts into our framework,  
224 public health agencies will be able to identify emergent strains in a timely manner, which can be used  
225 to promote targeted interventions. Our framework is also able to make fundamental insights into  
226 pathogen ecology. By quantifying the relative fitness advantage of new strains, our framework can  
227 help us identify potential drivers of emergence, including the role of population immunity from natural  
228 infection or vaccination. Finally, by identifying the specific genomic changes linked to fitness changes,  
229 this work provides testable biological hypotheses into genetic variants in each pathogen that are  
230 driving the changes in population fitness of that pathogen.

231 **Acknowledgements**

232 We thank Caitlin Collins, Megan O'Driscoll, Angkana T. Huang and Trevor Bedford, for useful  
233 discussions and feedback. We thank all the contributors to GISAID for sharing their data.

234 **Funding:** This work was supported financially by the European Research Council (No. 804744 to HS).  
235 The National Reference Center for Whooping Cough and Other Bordetella Infections receives support  
236 from Institut Pasteur and Public Health France (Santé publique France, Saint Maurice, France).

237 **Author contributions:** Conceptualisation: N.L., J.P. and H.S. Method development and modeling  
238 analysis: N.L., supported by L.D., J.P. and H.S. Isolate and genomic data collection: N.L., S.B. and V.B.  
239 Supervision: J.P. and H.S. Writing – original draft: N.L. Writing – review and editing: N.L., L.D., V.B.,  
240 S.B., J.P. and H.S. All authors provided input to the manuscript and reviewed the final version.

241 **Competing interests:** The authors declare no competing interests.

242 **Data and materials availability:** Code to replicate the main analyses of this paper will be available at  
243 <https://github.com/noemiefrancq/paper-index-fitness-dynamics-trees>. All sequences generated  
244 within this study were deposited in ENA, with accession numbers and metadata attached to each  
245 sequence in DataFile S3. All sequences used in this study are available online on GenBank and ENA (*B.*  
246 *pertussis*, *M. tuberculosis*) or GISAID (H3N2, SARS-CoV-2). Their accession numbers and metadata are  
247 listed in DataFiles S1-4.

248 **Figures**

249

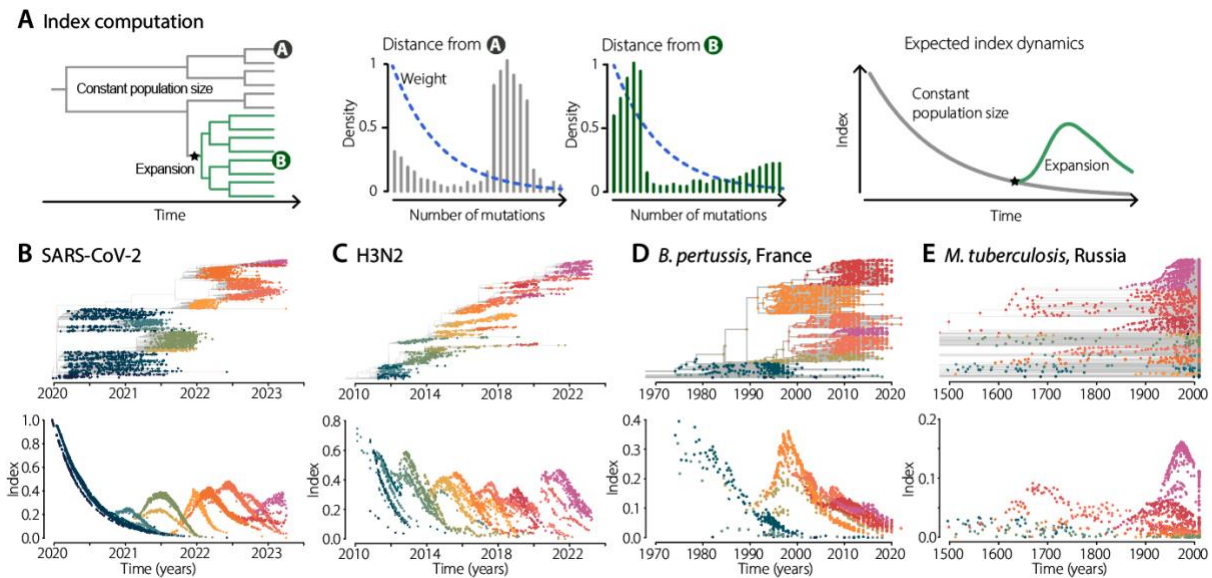

250

251 **Figure 1: Tracking changes in population composition by following index dynamics.**

252 **(A)** Schematics describing the principles of index computation. From left to right: example of a time-  
253 resolved phylogenetic tree with a background population (gray) and an emerging lineage (green);  
254 pairwise distance distribution from terminal node A, or terminal node B, respectively, to the rest of  
255 the population, with the dashed blue line denoting the geometric weighting; and expected index  
256 dynamics over time. See methods for details. **(B-D)** For each pathogen, we present the index dynamics  
257 computed at each node (terminal or internal). Colors represent the different lineages identified by  
258 their different index dynamics (Figure S2). Dynamics colored by known lineages are presented in  
259 Figure S1.



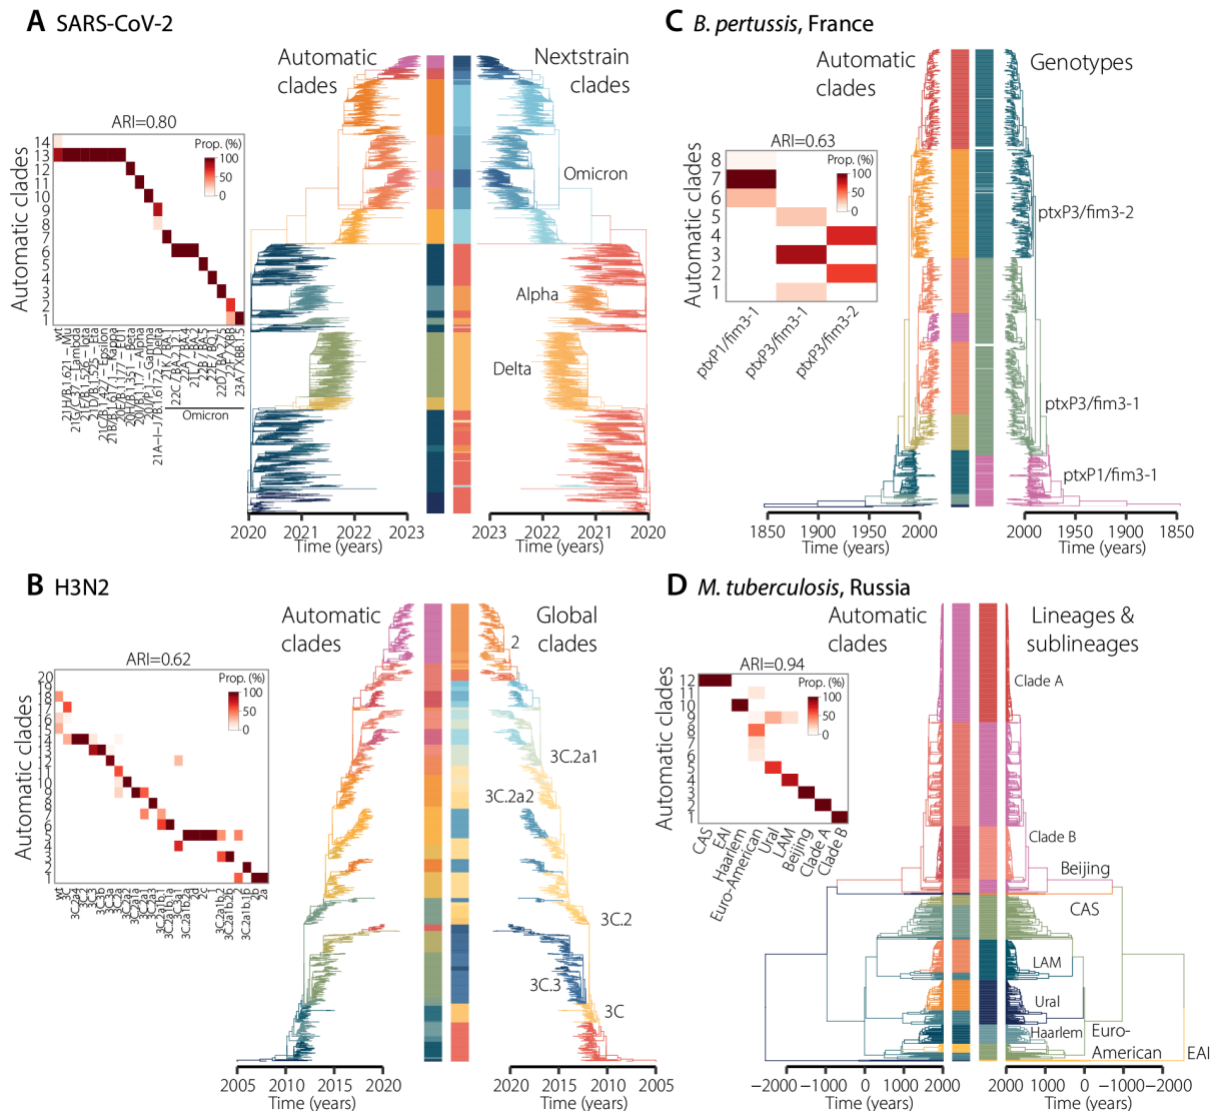

260

261

**Figure 2: Comparison of the identified lineages to the known population composition.**

262

For each pathogen, we present a heatmap comparing the known population structure (x-axis) to the

263

automatic clades found by our framework (y-axis). Darker colors represent more agreement between

264

both classifications. We also compare the timed-resolved phylogenetic trees colored by respective

265

lineage classifications: automatic clades on the left, and previously identified lineages on the right.

266

The colors of the automatic clades are the same as in Figure 1. For *M. tuberculosis*, LAM denotes the

267

Latin American-Mediterranean lineage, EAI denotes the East African Indian lineage and CAS denotes

268

the Central Asian Strain lineage.

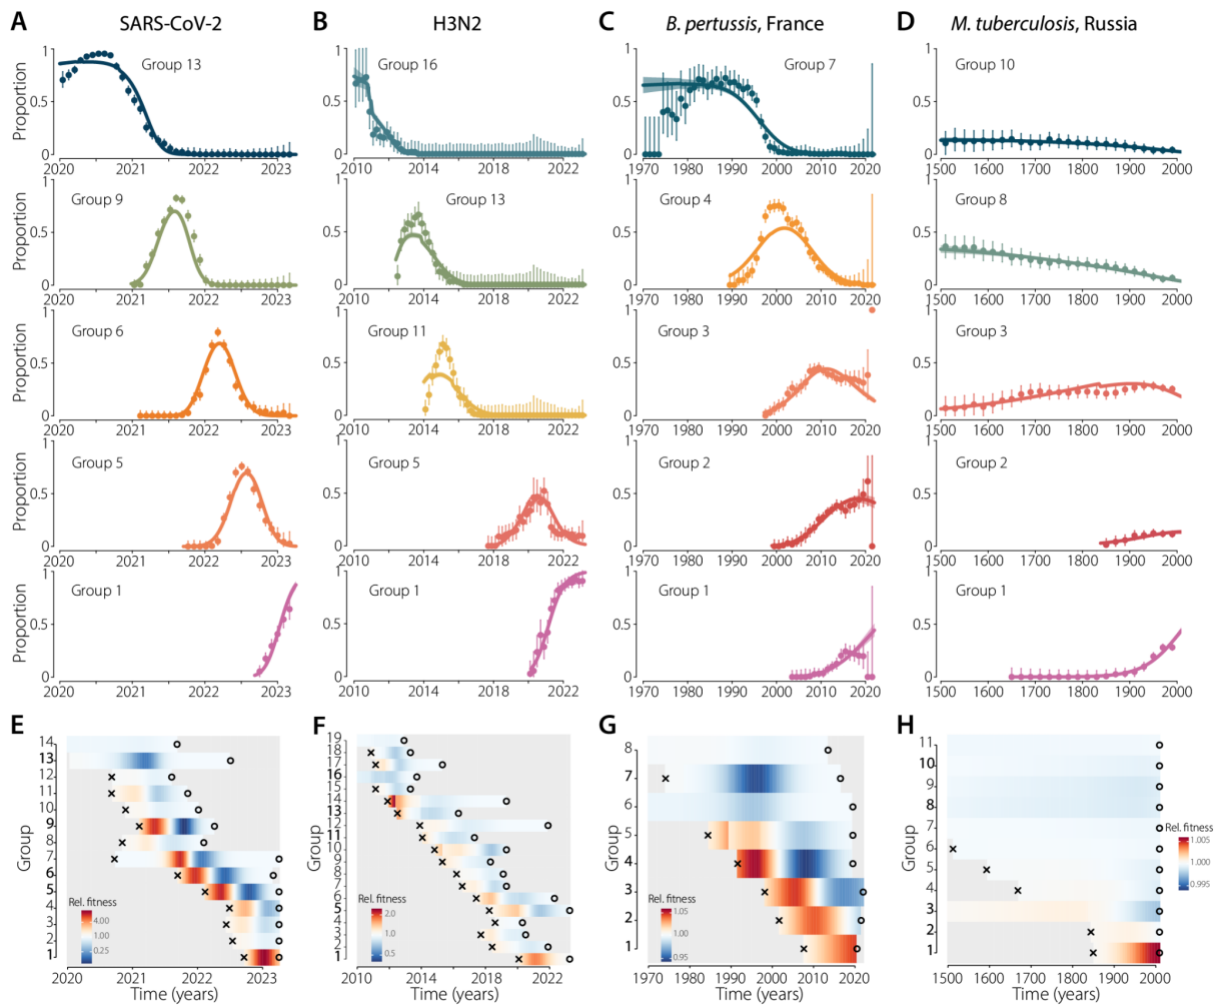

269

270

**Figure 3: Estimation of the fitness of each lineage.**

271

**(A-D)** Model fits per pathogen. For each pathogen, we present the fits for the five most prevalent

272

groups. The fits for all groups are presented in Figure S6-9. Colored dots represent data, bars denote

273

95% confidence intervals. Colored lines and shaded areas represent the median and 95% credible

274

interval of the posterior. **(E-H)** Relative fitness of each group, over time. Estimates for all groups are

275

presented in Figure S10. Crosses indicate the group's MRCA. Open circles indicate the last isolate from

276

each group, in our datasets.

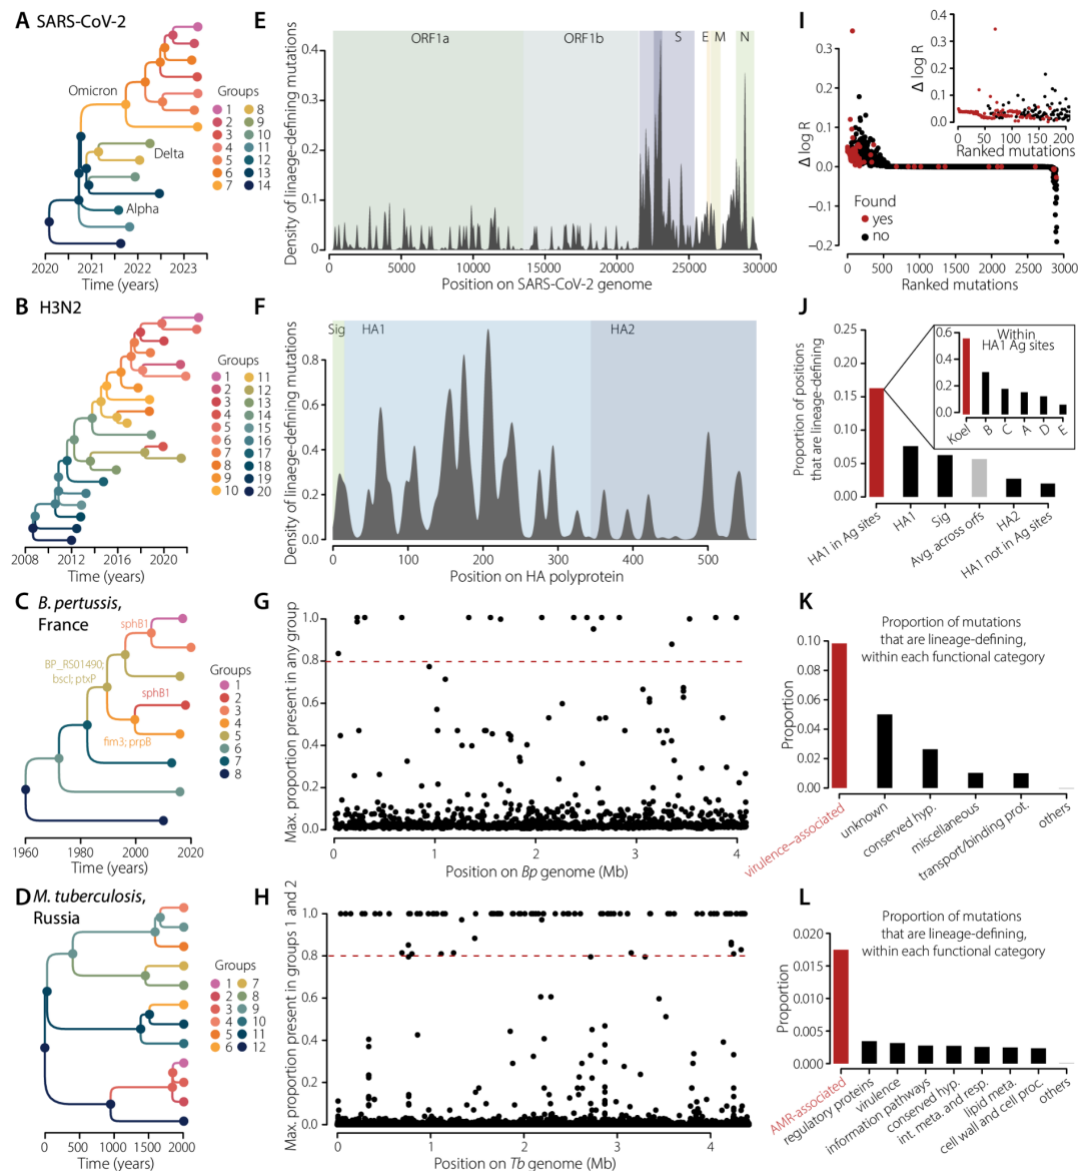

277  
278  
279  
280  
281  
282  
283  
284  
285  
286  
287  
288  
289  
290  
291  
292  
293

**Figure 4: Lineage-defining genetic mutations.**

For each pathogen, we present a summary of the genetic evolution of the lineages. **(A-D)** For each pathogen, we present the lineage trees representing the genealogical relationship between them. Colors indicate groups. **(E-H)** Lineage-defining mutations along the genome of each pathogen considered. For SARS-CoV-2 (E) and H3N2 (F) viruses we plot the density of lineage-defining mutations along the full genome (SARS-CoV-2) or HA polyprotein (H3N2). Colors indicate the main ORFs. For *B. pertussis* (G) and *M. tuberculosis* (H) we plot for each mutation the maximum proportion of that mutation that is present in any group (*B. pertussis*) or in groups 1 and 2 (*M. tuberculosis*). The dashed lines represent the 0.8 cutoff. The lists of mutations identified can be found in Data Files S5-8. **(I-L)** Functional relevance of the mutations identified. (I) For SARS-CoV-2, we compare the substitution analyzed by Obermeyer and colleagues(8) (black), and the mutations found to be lineage-defining in our study (red). (J) For H3N2, we plot the proportion of positions that are lineage-defining within each HA polyprotein subunit, and antigenic sites(33, 34)(insert). (K) For *B. pertussis*, we plot the proportion of mutations that are lineage-defining within each functional category(36) (L) Same as K, for *M. tuberculosis*(37). The lists of lineage-defining mutations for each pathogen can be found in DataFiles S5-8.

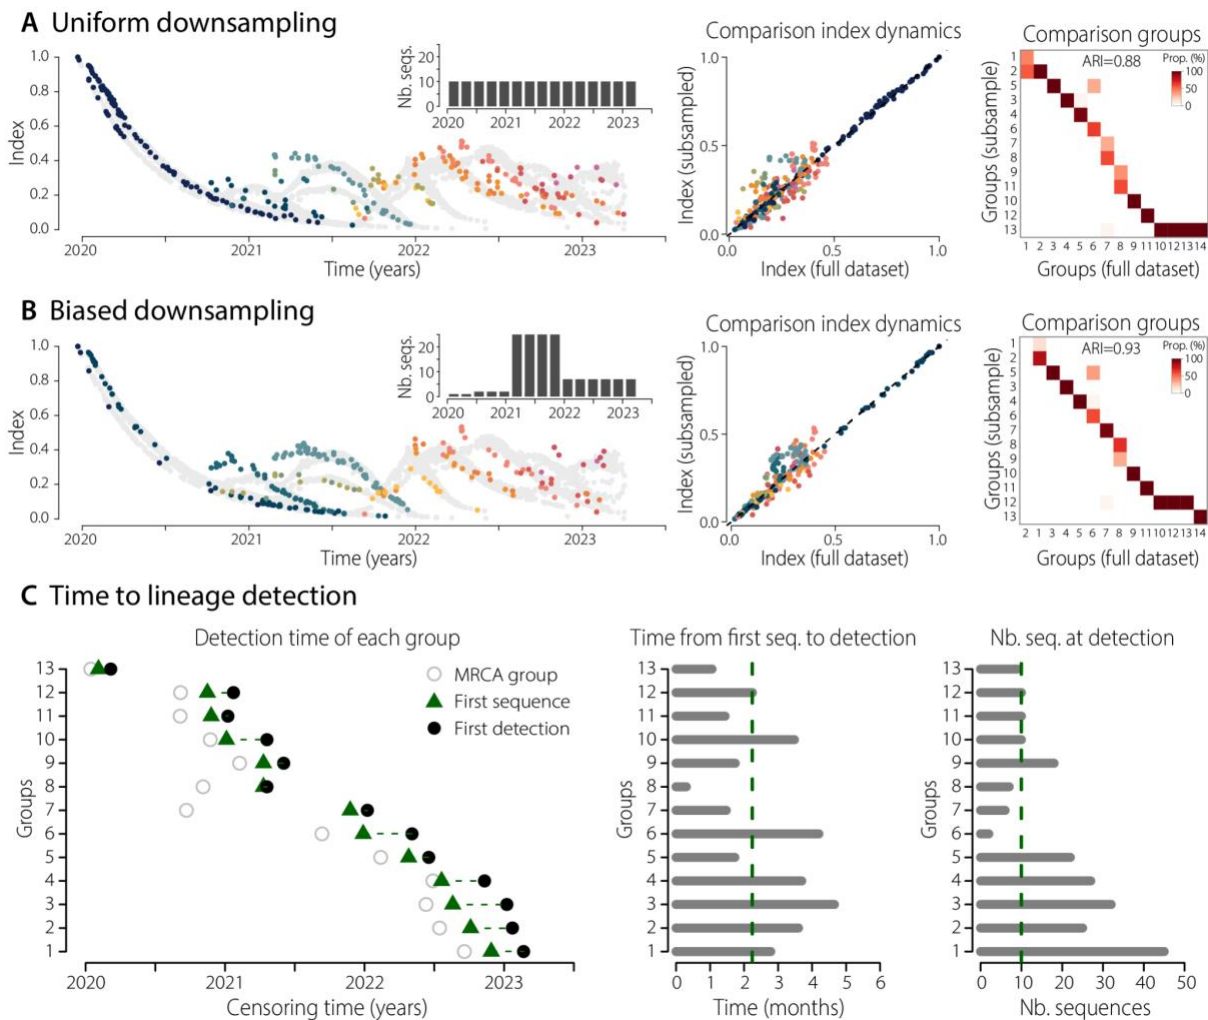

294

295

**Figure 5: Robustness of the framework to sampling intensities and time to lineage detection.**

296

**(A-B)** Robustness to downsampling. We kept only 150 sequences from the global SARS-CoV-2 tree,

297

either sampled uniformly through time (A) or in a temporally uneven manner (B). From left to right:

298

Index dynamics computed on the subsampled trees, colored by detected lineages, with temporal

299

distribution of sequences in inserts; pairwise comparison of the index computed at nodes (internal

300

and terminal) in the trees from the full dataset (x-axis) and subsampled datasets (y-axis); heatmap

301

comparing the automatic clades found by our framework on the full dataset (x-axis) to the automatic

302

clades found on the subsampled datasets (y-axis). Darker colors on the heatmap denote more

303

agreement between both classifications. **(C)** Time to lineage detection. The full global SARS-CoV-2

304

dataset was censored every two weeks and reran the detection algorithm. From left to right: detection

305

time of each group, with open circles denoting the group's MRCA in our tree, the green triangles

306

denoting the first sequence of the group in our dataset, and the black dots denoting the first detection

307

of the group by our framework; time from first sequence isolated in our dataset to group detection;

308

number of sequences within each group at the time of detection. The dashed lines denote the median

309

time to detection, or number of sequences at detection, respectively.

## References:

1. M. Meijers, D. Ruchnewitz, J. Eberhardt, M. Łuksza, M. Lässig, Population immunity predicts evolutionary trajectories of SARS-CoV-2. *Cell* (2023), doi:10.1016/j.cell.2023.09.022.
2. M. Łuksza, M. Lässig, A predictive fitness model for influenza. *Nature*. **507**, 57–61 (2014).
3. N. Lefrancq, V. Bouchez, N. Fernandes, A.-M. Barkoff, T. Bosch, T. Dalby, T. Åkerlund, J. Darenberg, K. Fabianova, D. F. Vestheim, N. K. Fry, J. J. González-López, K. Gullsby, A. Habington, Q. He, D. Litt, H. Martini, D. Piérard, P. Stefanelli, M. Stegger, J. Zavadilova, N. Armatys, A. Landier, S. Guillot, S. L. Hong, P. Lemey, J. Parkhill, J. Toubiana, S. Cauchemez, H. Salje, S. Brisse, Global spatial dynamics and vaccine-induced fitness changes of *Bordetella pertussis*. *Sci. Transl. Med.* **14**, eabn3253 (2022).
4. A. Rambaut, E. C. Holmes, Á. O'Toole, V. Hill, J. T. McCrone, C. Ruis, L. du Plessis, O. G. Pybus, A dynamic nomenclature proposal for SARS-CoV-2 lineages to assist genomic epidemiology. *Nat Microbiol.* **5**, 1403–1407 (2020).
5. I. Aksamentov, C. Roemer, E. Hodcroft, R. Neher, Nextclade: clade assignment, mutation calling and quality control for viral genomes. *J. Open Source Softw.* **6**, 3773 (2021).
6. Influenza virus characterization - Summary Europe, December 2022. *European Centre for Disease Prevention and Control* (2023), (available at <https://www.ecdc.europa.eu/en/publications-data/influenza-virus-characterization-summary-europe-december-2022>).
7. M. J. Bart, S. R. Harris, A. Advani, Y. Arakawa, D. Bottero, V. Bouchez, P. K. Cassidy, C.-S. Chiang, T. Dalby, N. K. Fry, M. E. Gaillard, M. van Gent, N. Guiso, H. O. Hallander, E. T. Harvill, Q. He, H. G. J. van der Heide, K. Heuvelman, D. F. Hozbor, K. Kamachi, G. I. Karataev, R. Lan, A. Lutyńska, R. P. Maharjan, J. Mertsola, T. Miyamura, S. Octavia, A. Preston, M. A. Quail, V. Sintchenko, P. Stefanelli, M. L. Tondella, R. S. W. Tsang, Y. Xu, S.-M. Yao, S. Zhang, J. Parkhill, F. R. Mooi, Global population structure and evolution of *Bordetella pertussis* and their relationship with vaccination. *MBio.* **5**, e01074 (2014).
8. F. Obermeyer, M. Jankowiak, N. Barkas, S. F. Schaffner, J. D. Pyle, L. Yurkovetskiy, M. Bosso, D. J. Park, M. Babadi, B. L. MacInnis, J. Luban, P. C. Sabeti, J. E. Lemieux, Analysis of 6.4 million SARS-CoV-2 genomes identifies mutations associated with fitness. *Science*. **376**, 1327–1332 (2022).
9. S. Belman, N. Lefrancq, S. Nzenze, S. Downs, M. du Plessis, S. Lo, The Global Pneumococcal Sequencing Consortium, L. McGee, S. A. Madhi, A. von Gottberg, S. D. Bentley, H. Salje, Geographic migration and vaccine-induced fitness changes of *Streptococcus pneumoniae*. *bioRxiv* (2023), p. 2023.01.18.524577.
10. R. A. Neher, C. A. Russell, B. I. Shraiman, Predicting evolution from the shape of genealogical trees. *Elife.* **3** (2014), doi:10.7554/eLife.03568.
11. T. Stadler, S. Bonhoeffer, Uncovering epidemiological dynamics in heterogeneous host populations using phylogenetic methods. *Philos. Trans. R. Soc. Lond. B Biol. Sci.* **368**, 20120198 (2013).
12. L. Kepler, M. Hamins-Puertolas, D. A. Rasmussen, Decomposing the sources of SARS-CoV-2 fitness variation in the United States. *Virus Evol.* **7**, veab073 (2021).
13. J. Barido-Sottani, T. G. Vaughan, T. Stadler, A Multitype Birth-Death Model for Bayesian Inference of Lineage-Specific Birth and Death Rates. *Syst. Biol.* **69**, 973–986 (2020).
14. G. Tonkin-Hill, J. A. Lees, S. D. Bentley, S. D. W. Frost, J. Corander, Fast hierarchical Bayesian analysis of population structure. *Nucleic Acids Res.* **47**, 5539–5549 (2019).
15. E. M. Volz, W. Carsten, Y. H. Grad, S. D. W. Frost, A. M. Dennis, X. Didelot, Identification of Hidden Population Structure in Time-Scaled Phylogenies. *Syst. Biol.* **69**, 884–896 (2020).
16. T. Wirth, V. Wong, F. Vandenesch, J.-P. Rasigade, Applied phyloepidemiology: Detecting drivers of pathogen transmission from genomic signatures using density measures. *Evol. Appl.* **13**, 1513–1525 (2020).
17. J. F. C. Kingman, On the Genealogy of Large Populations. *J. Appl. Probab.* **19**, 27–43 (1982).
18. R. C. Griffiths, S. Tavaré, Sampling theory for neutral alleles in a varying environment. *Philos.*

- Trans. R. Soc. Lond. B Biol. Sci.* **344**, 403–410 (1994).
19. F. Austerlitz, B. Jung-Muller, B. Godelle, P.-H. Gouyon, Evolution of Coalescence Times, Genetic Diversity and Structure during Colonization. *Theor. Popul. Biol.* **51**, 148–164 (1997).
  20. N. Casali, V. Nikolayevskyy, Y. Balabanova, S. R. Harris, O. Ignatyeva, I. Kontsevaya, J. Corander, J. Bryant, J. Parkhill, S. Nejentsev, R. D. Horstmann, T. Brown, F. Drobniowski, Evolution and transmission of drug-resistant tuberculosis in a Russian population. *Nat. Genet.* **46**, 279–286 (2014).
  21. L. Hubert, P. Arabe, Comparing partitions. *J. Classification.* **2**, 193–218 (1985).
  22. A. Sanyaolu, C. Okorie, A. Marinkovic, N. Haider, A. F. Abbasi, U. Jaferi, S. Prakash, V. Balendra, The emerging SARS-CoV-2 variants of concern. *Ther Adv Infect Dis.* **8**, 20499361211024372 (2021).
  23. R. Viana, S. Moyo, D. G. Amoako, H. Tegally, C. Scheepers, C. L. Althaus, U. J. Anyaneji, P. A. Bester, M. F. Boni, M. Chand, W. T. Choga, R. Colquhoun, M. Davids, K. Deforche, D. Doolabh, L. du Plessis, S. Engelbrecht, J. Everatt, J. Giandhari, M. Giovanetti, D. Hardie, V. Hill, N.-Y. Hsiao, A. Iranzadeh, A. Ismail, C. Joseph, R. Joseph, L. Koopile, S. L. Kosakovsky Pond, M. U. G. Kraemer, L. Kuate-Lere, O. Laguda-Akingba, O. Lesetedi-Mafoko, R. J. Lessells, S. Lockman, A. G. Lucaci, A. Maharaj, B. Mahlangu, T. Maponga, K. Mahlakwane, Z. Makatini, G. Marais, D. Maruapula, K. Masupu, M. Matshaba, S. Mayaphi, N. Mbhele, M. B. Mbulawa, A. Mendes, K. Mlisana, A. Mnguni, T. Mohale, M. Moir, K. Moruisi, M. Mosepele, G. Motsatsi, M. S. Motswaledi, T. Mphoyakgosi, N. Msomi, P. N. Mwangi, Y. Naidoo, N. Ntuli, M. Nyaga, L. Olubayo, S. Pillay, B. Radibe, Y. Ramphal, U. Ramphal, J. E. San, L. Scott, R. Shapiro, L. Singh, P. Smith-Lawrence, W. Stevens, A. Strydom, K. Subramoney, N. Tebeila, D. Tshiabuila, J. Tsui, S. van Wyk, S. Weaver, C. K. Wibmer, E. Wilkinson, N. Wolter, A. E. Zarebski, B. Zuze, D. Goedhals, W. Preiser, F. Treurnicht, M. Venter, C. Williamson, O. G. Pybus, J. Bhiman, A. Glass, D. P. Martin, A. Rambaut, S. Gaseitsiwe, A. von Gottberg, T. de Oliveira, Rapid epidemic expansion of the SARS-CoV-2 Omicron variant in southern Africa. *Nature.* **603**, 679–686 (2022).
  24. I. B. Olawoye, P. E. Oluniyi, J. U. Oguzie, J. N. Uwanibe, T. A. Kayode, T. J. Olumade, F. V. Ajogbasile, E. Parker, P. E. Eromon, P. Abechi, T. A. Sobajo, C. A. Ugwu, U. E. George, F. Ayode, K. Akano, N. E. Oyejide, I. Nosamiefan, I. Fred-Akintunwa, K. Adedotun-Sulaiman, F. B. Brimmo, B. B. Adegboyega, C. Philip, R. A. Adeleke, G. C. Chukwu, M. I. Ahmed, O. O. Ope-Ewe, S. G. Otitoola, O. A. Ogunsanya, M. F. Saibu, A. E. Sijuwola, G. O. Ezekiel, O. G. John, J. O. Akin-John, O. O. Akinlo, O. O. Fayemi, T. O. Ipaye, D. C. Nwodo, A. E. Omoniyi, I. B. Omwanghe, C. A. Terkuma, J. Okolie, O. Ayo-Ale, O. Ikponmwosa, E. Benevolence, G. O. Naregose, A. E. Patience, O. Blessing, A. Micheal, A. Jacqueline, J. O. Aiyepada, P. Ebhodaghe, O. Racheal, E. Rita, G. E. Rosemary, E. Solomon, E. Anieno, Y. Edna, A. O. Chris, A. I. Donatus, E. Ogbaini-Emovon, M. Y. Tatfeng, H. E. Omunakwe, M. Bob-Manuel, R. A. Ahmed, C. K. Onwuamah, J. O. Shaibu, A. Okwuraiwe, A. E. Ataga, A. Bock-Oruma, F. Daramola, I. F. Yusuf, A. Fajola, N.-A. Ntia, J. J. Ekpo, A. E. Moses, B. W. Moore-Igwe, O. E. Fakayode, M. Akinola, I. M. Kida, B. S. Oderinde, Z. W. Wudiri, O. O. Adeyemi, O. A. Akanbi, A. Ahumibe, A. Akinpelu, O. Ayansola, O. Babatunde, A. A. Omoare, C. Chukwu, N. G. Mba, E. C. Omoruyi, O. Olisa, O. K. Akande, I. E. Nwafor, M. A. Ekeh, E. Ndoma, R. L. Ewah, R. O. Duruihuoma, A. Abu, E. Odeh, V. Onyia, C. K. Ojide, S. Okoro, D. Igwe, E. O. Ogah, K. Khan, N. A. Ajayi, C. N. Ugwu, K. N. Ukwaja, N. I. Ugwu, C. Abejegah, N. Adedosu, O. Ayodeji, A. A. Liasu, R. O. Isamotu, G. Gadzama, B. A. Petros, K. J. Siddle, S. F. Schaffner, G. Akpede, C. O. Erameh, M. M. Baba, F. Oladiji, R. Audu, N. Ndodo, A. Fowotade, S. Okogbenin, P. O. Okokhere, D. J. Park, B. L. Mcannis, I. M. Adetifa, C. Ihekweazu, B. L. Salako, O. Tomori, A. N. Happi, O. A. Folarin, K. G. Andersen, P. C. Sabeti, C. T. Happi, Emergence and spread of two SARS-CoV-2 variants of interest in Nigeria. *Nat. Commun.* **14**, 811 (2023).
  25. K. Laiton-Donato, C. Franco-Muñoz, D. A. Álvarez-Díaz, H. A. Ruiz-Moreno, J. A. Usme-Ciro, D. A. Prada, J. Reales-González, S. Corchuelo, M. T. Herrera-Sepúlveda, J. Naizaque, G. Santamaría, J. Rivera, P. Rojas, J. H. Ortiz, A. Cardona, D. Malo, F. Prieto-Alvarado, F. R. Gómez, M. Wiesner, M. L. O. Martínez, M. Mercado-Reyes, Characterization of the emerging B.1.621 variant of interest

- of SARS-CoV-2. *Infect. Genet. Evol.* **95**, 105038 (2021).
26. E. B. Hodcroft, M. Zuber, S. Nadeau, T. G. Vaughan, K. H. D. Crawford, C. L. Althaus, M. L. Reichmuth, J. E. Bowen, A. C. Walls, D. Corti, J. D. Bloom, D. Veessler, D. Mateo, A. Hernando, I. Comas, F. González-Candelas, SeqCOVID-SPAIN consortium, T. Stadler, R. A. Neher, Spread of a SARS-CoV-2 variant through Europe in the summer of 2020. *Nature*. **595**, 707–712 (2021).
  27. L. Baker, T. Brown, M. C. Maiden, F. Drobniewski, Silent nucleotide polymorphisms and a phylogeny for *Mycobacterium tuberculosis*. *Emerg. Infect. Dis.* **10**, 1568–1577 (2004).
  28. S. Gagneux, K. DeRiemer, T. Van, M. Kato-Maeda, B. C. de Jong, S. Narayanan, M. Nicol, S. Niemann, K. Kremer, M. C. Gutierrez, M. Hilty, P. C. Hopewell, P. M. Small, Variable host-pathogen compatibility in *Mycobacterium tuberculosis*. *Proc. Natl. Acad. Sci. U. S. A.* **103**, 2869–2873 (2006).
  29. S. Homolka, M. Projahn, S. Feuerriegel, T. Ubben, R. Diel, U. Nübel, S. Niemann, High resolution discrimination of clinical *Mycobacterium tuberculosis* complex strains based on single nucleotide polymorphisms. *PLoS One*. **7**, e39855 (2012).
  30. C. A. Russell, T. C. Jones, I. G. Barr, N. J. Cox, R. J. Garten, V. Gregory, I. D. Gust, A. W. Hampson, A. J. Hay, A. C. Hurt, J. C. de Jong, A. Kelso, A. I. Klimov, T. Kageyama, N. Komadina, A. S. Lapedes, Y. P. Lin, A. Mosterin, M. Obuchi, T. Odagiri, A. D. M. E. Osterhaus, G. F. Rimmelzwaan, M. W. Shaw, E. Skepner, K. Stohr, M. Tashiro, R. A. M. Fouchier, D. J. Smith, The global circulation of seasonal influenza A (H3N2) viruses. *Science*. **320**, 340–346 (2008).
  31. V. N. Petrova, C. A. Russell, The evolution of seasonal influenza viruses. *Nat. Rev. Microbiol.* **16**, 47–60 (2018).
  32. V. Bouchez, S. Guillot, A. Landier, N. Armatys, S. Matczak, French pertussis microbiology study group, J. Toubiana, S. Brisse, Evolution of *Bordetella pertussis* over a 23-year period in France, 1996 to 2018. *Euro Surveill.* **26** (2021), doi:10.2807/1560-7917.ES.2021.26.37.2001213.
  33. D. C. Wiley, I. A. Wilson, J. J. Skehel, Structural identification of the antibody-binding sites of Hong Kong influenza haemagglutinin and their involvement in antigenic variation. *Nature*. **289**, 373–378 (1981).
  34. B. F. Koel, D. F. Burke, T. M. Bestebroer, S. van der Vliet, G. C. M. Zondag, G. Vervaet, E. Skepner, N. S. Lewis, M. I. J. Spronken, C. A. Russell, M. Y. Eropkin, A. C. Hurt, I. G. Barr, J. C. de Jong, G. F. Rimmelzwaan, A. D. M. E. Osterhaus, R. A. M. Fouchier, D. J. Smith, Substitutions near the receptor binding site determine major antigenic change during influenza virus evolution. *Science*. **342**, 976–979 (2013).
  35. L. Coutte, R. Antoine, H. Drobecq, C. Locht, F. Jacob-Dubuisson, Subtilisin-like autotransporter serves as maturation protease in a bacterial secretion pathway. *EMBO J.* **20**, 5040–5048 (2001).
  36. J. Parkhill, M. Sebaihia, A. Preston, L. D. Murphy, N. Thomson, D. E. Harris, M. T. G. Holden, C. M. Churcher, S. D. Bentley, K. L. Mungall, A. M. Cerdeño-Tárraga, L. Temple, K. James, B. Harris, M. A. Quail, M. Achtman, R. Atkin, S. Baker, D. Basham, N. Bason, I. Cherevach, T. Chillingworth, M. Collins, A. Cronin, P. Davis, J. Doggett, T. Feltwell, A. Goble, N. Hamlin, H. Hauser, S. Holroyd, K. Jagels, S. Leather, S. Moule, H. Norberczak, S. O’Neil, D. Ormond, C. Price, E. Rabinowitsch, S. Rutter, M. Sanders, D. Saunders, K. Seeger, S. Sharp, M. Simmonds, J. Skelton, R. Squares, S. Squares, K. Stevens, L. Unwin, S. Whitehead, B. G. Barrell, D. J. Maskell, Comparative analysis of the genome sequences of *Bordetella pertussis*, *Bordetella parapertussis* and *Bordetella bronchiseptica*. *Nat. Genet.* **35**, 32–40 (2003).
  37. P. Chitale, A. D. Lemenze, E. C. Fogarty, A. Shah, C. Grady, A. R. Odom-Mabey, W. E. Johnson, J. H. Yang, A. M. Eren, R. Brosch, P. Kumar, D. Alland, A comprehensive update to the *Mycobacterium tuberculosis* H37Rv reference genome. *Nat. Commun.* **13**, 7068 (2022).
  38. J. Hadfield, C. Megill, S. M. Bell, J. Huddleston, B. Potter, C. Callender, P. Sagulenko, T. Bedford, R. A. Neher, Nextstrain: real-time tracking of pathogen evolution. *Bioinformatics*. **34**, 4121–4123 (2018).
  39. K. Katoh, K. Misawa, K.-I. Kuma, T. Miyata, MAFFT: a novel method for rapid multiple sequence alignment based on fast Fourier transform. *Nucleic Acids Res.* **30**, 3059–3066 (2002).

40. M. Martin, Cutadapt removes adapter sequences from high-throughput sequencing reads. *EMBNet.journal*. **17**, 10–12 (2011).
41. S. Andrews, Others, FastQC: a quality control tool for high throughput sequence data. 2010 (2017).
42. H. Li, Aligning sequence reads, clone sequences and assembly contigs with BWA-MEM. *arXiv [q-bio.GN]* (2013), (available at <http://arxiv.org/abs/1303.3997>).
43. A. McKenna, M. Hanna, E. Banks, A. Sivachenko, K. Cibulskis, A. Kernytsky, K. Garimella, D. Altshuler, S. Gabriel, M. Daly, M. A. DePristo, The Genome Analysis Toolkit: a MapReduce framework for analyzing next-generation DNA sequencing data. *Genome Res.* **20**, 1297–1303 (2010).
44. N. Casali, V. Nikolayevskyy, Y. Balabanova, O. Ignatyeva, I. Kontsevaya, S. R. Harris, S. D. Bentley, J. Parkhill, S. Nejentsev, S. E. Hoffner, R. D. Horstmann, T. Brown, F. Drobniowski, Microevolution of extensively drug-resistant tuberculosis in Russia. *Genome Res.* **22**, 735–745 (2012).
45. D. Arndt, J. R. Grant, A. Marcu, T. Sajed, A. Pon, Y. Liang, D. S. Wishart, PHASTER: a better, faster version of the PHAST phage search tool. *Nucleic Acids Res.* **44**, W16–21 (2016).
46. N. J. Croucher, A. J. Page, T. R. Connor, A. J. Delaney, J. A. Keane, S. D. Bentley, J. Parkhill, S. R. Harris, Rapid phylogenetic analysis of large samples of recombinant bacterial whole genome sequences using Gubbins. *Nucleic Acids Res.* **43**, e15 (2015).
47. L.-T. Nguyen, H. A. Schmidt, A. von Haeseler, B. Q. Minh, IQ-TREE: a fast and effective stochastic algorithm for estimating maximum-likelihood phylogenies. *Mol. Biol. Evol.* **32**, 268–274 (2015).
48. D. T. Hoang, O. Chernomor, A. von Haeseler, B. Q. Minh, L. S. Vinh, UFBoot2: Improving the Ultrafast Bootstrap Approximation. *Mol. Biol. Evol.* **35**, 518–522 (2018).
49. M. A. Suchard, P. Lemey, G. Baele, D. L. Ayres, A. J. Drummond, A. Rambaut, Bayesian phylogenetic and phylodynamic data integration using BEAST 1.10. *Virus Evol.* **4**, vey016 (2018).
50. A. J. Drummond, S. Y. W. Ho, M. J. Phillips, A. Rambaut, Relaxed phylogenetics and dating with confidence. *PLoS Biol.* **4**, e88 (2006).
51. V. N. Minin, E. W. Bloomquist, M. A. Suchard, Smooth skyride through a rough skyline: Bayesian coalescent-based inference of population dynamics. *Mol. Biol. Evol.* **25**, 1459–1471 (2008).
52. D. L. Ayres, M. P. Cummings, G. Baele, A. E. Darling, P. O. Lewis, D. L. Swofford, J. P. Huelsenbeck, P. Lemey, A. Rambaut, M. A. Suchard, BEAGLE 3: Improved Performance, Scaling, and Usability for a High-Performance Computing Library for Statistical Phylogenetics. *Systematic Biology*. **68** (2019), pp. 1052–1061.
53. A. Rambaut, A. J. Drummond, D. Xie, G. Baele, M. A. Suchard, Posterior Summarization in Bayesian Phylogenetics Using Tracer 1.7. *Syst. Biol.* **67**, 901–904 (2018).
54. K. I. Bos, K. M. Harkins, A. Herbig, M. Coscolla, N. Weber, I. Comas, S. A. Forrest, J. M. Bryant, S. R. Harris, V. J. Schuenemann, T. J. Campbell, K. Majander, A. K. Wilbur, R. A. Guichon, D. L. Wolfe Steadman, D. C. Cook, S. Niemann, M. A. Behr, M. Zumarraga, R. Bastida, D. Huson, K. Nieselt, D. Young, J. Parkhill, J. E. Buikstra, S. Gagneux, A. C. Stone, J. Krause, Pre-Columbian mycobacterial genomes reveal seals as a source of New World human tuberculosis. *Nature*. **514**, 494–497 (2014).
55. X. Didelot, N. J. Croucher, S. D. Bentley, S. R. Harris, D. J. Wilson, Bayesian inference of ancestral dates on bacterial phylogenetic trees. *Nucleic Acids Res.* **46**, e134 (2018).
56. S. N. Wood, *Generalized Additive Models: An Introduction with R, Second Edition* (CRC Press, 2017).
57. S. Wood, M. S. Wood, Package “mgcv.” *R package version*. **1**, 729 (2015).
58. J. Gabry, R. Češnovar, cmdstanr: R Interface to ‘CmdStan’. : <https://mc-stan.org/cmdstanr>, <https://discourse.mc...> (2021).
59. T. Stadler, Simulating trees with a fixed number of extant species. *Syst. Biol.* **60**, 676–684 (2011).
60. E. M. Volz, K. Koelle, T. Bedford, Viral phylodynamics. *PLoS Comput. Biol.* **9**, e1002947 (2013).



## Supplementary materials

Materials and methods

Figures S1-S22

Data Files S1-S8

## List of supplementary materials

- 1
- 2
- 3 **Materials and methods**
- 4
- 5 **Figures**
- 6 Figure S1: Index dynamics colored by known lineages
- 7 Figure S2: Lineage detection based on index dynamics for each pathogen
- 8 Figure S3: Index dynamics of SARS-CoV-2 across continents
- 9 Figure S4: SARS-CoV-2 lineages identified across continents
- 10 Figure S5: SARS-CoV-2 lineages identified with treestructure and fastbaps
- 11 Figure S6: Fitness model fits for all lineages of SARS-CoV-2
- 12 Figure S7: Fitness model fits for all lineages of H3N2
- 13 Figure S8: Fitness model fits for all lineages of *B. pertussis*
- 14 Figure S9: Fitness model fits for all lineages of *M. tuberculosis*
- 15 Figure S10: Fitness estimates for all pathogen lineages
- 16 Figure S11: Proportion of mutations that are defining the lineages of SARS-CoV-2 worldwide, by ORFs
- 17 Figure S12: Phylogenetic tree and mutations in the spike protein that are defining lineages in the
- 18 global SARS-CoV-2 dataset
- 19 Figure S13: Phylogenetic tree and mutations in the HA1 subunit that are defining lineages in the
- 20 global H3N2 dataset
- 21 Figure S14: Phylogenetic tree and mutations defining lineages in the *B. pertussis* dataset from in
- 22 France
- 23 Figure S15: Phylogenetic tree and mutations defining lineages 1 and 2 in the *M. tuberculosis* dataset
- 24 from in Samara, Russia
- 25 Figure S16: Population history, pairwise distance distribution and index dynamics.
- 26 Figure S17: Robustness of the framework to the choice of timescale
- 27 Figure S18: Non-explained deviance as a function of the number of groups in the lineage detection
- 28 algorithm
- 29 Figure S19: Proportion of synonymous mutations that are lineage-defining, by gene functional
- 30 categories, for *B. pertussis* and *M. tuberculosis*
- 31 Figure S20: Example of index dynamics on censored global SARS-CoV-2 datasets
- 32 Figure S21: Illustration of the index behavior in different population histories
- 33 Figure S22: Robustness to sampling schemes, from simulation study
- 34
- 35 **Data Files**
- 36 Data File S1: Isolates SARS-CoV-2
- 37 Data File S2: Isolates H3N2
- 38 Data File S3: Isolates *Bordetella pertussis*
- 39 Data File S4: Isolates *Mycobacterium tuberculosis*
- 40 Data File S5: List of SARS-CoV-2 lineage-defining mutations
- 41 Data File S6: List of H3N2 lineage-defining mutations
- 42 Data File S7: List of *Bordetella pertussis* lineage-defining mutations
- 43 Data File S8: List of *Mycobacterium tuberculosis* lineage-defining mutations

## 1 **Materials and methods**

2

### 3 **Sequence data**

4 For each pathogen, we compiled a dataset to investigate the changes in the population composition.  
5 For SARS-CoV-2 and Influenza H3N2, we extracted the datasets from the publicly available NextStrain  
6 timed-resolved phylogenies accessed on 14 April 2023(38). These datasets are sub-samples from all  
7 publicly available sequences in GISAID, to represent the diversity as much as possible (we used the  
8 'all-time' dataset for SARS-CoV-2 and the '12y' one for H3N2). In all, we have 3129 whole genome  
9 SARS-CoV-2 sequences sampled from 26 December 2019 to 3 April 2023, and 1476 Influenza  
10 Hemagglutinin (HA) sequences from 1 January 2005 to 3 April 2023 (Data File S1-2). For *B. pertussis*,  
11 we used 1248 sequences from 1953 to 2022, collected by the National Reference Center (NRC) for  
12 Whooping Cough and Other Bordetella Infections in France (Data File S3). This dataset is composed of  
13 1023 sequences previously published and 225 newly sequenced isolates. The new isolates have been  
14 sequenced with the same methods as previously described(3). This dataset is representative of the *B.*  
15 *pertussis* diversity in France as the NRC is receiving isolates from 42 sentinelle hospitals throughout  
16 France. For *M. tuberculosis*, we used 997 previously published sequences, isolated in 2008-2010 in  
17 Samara, Russia(20). This dataset is also representative of *M. tuberculosis* sequence diversity at that  
18 location as isolates were prospectively collected from individual patients living in the region and  
19 representative of the entire population (Data File S4).

20

21

### 22 **Multi-sequence alignment for each pathogen**

23 We compiled alignments of all sequences being used. For SARS-CoV-2, we used the precomputed  
24 multi-sequence alignment provided by GISAID. For H3N2, we aligned all HA sequences using  
25 MAFFT(39), with default settings. The alignment was then manually checked. For *B. pertussis* and *M.*  
26 *tuberculosis*, we worked from raw reads. Briefly, adapters and barcodes were stripped from the fastq  
27 data and the reads were quality filtered and trimmed using a Phred quality threshold score of 30 using  
28 Cutadapt(40). We checked the quality of each fastq file using FastQC(41). Reads were mapped against  
29 the complete Tohama I reference genome (Accession number: NC\_002929), or the complete H37Rv  
30 reference genome (Accession number: NC\_000962.3), using BWA-MEM algorithm(42), for *B. pertussis*  
31 and *M. tuberculosis*, respectively. Extraction of Single Nucleotide Polymorphisms (SNP) was achieved  
32 with the GATK HaplotypeCaller, with ERC GVCF settings(43). We kept variants that were present in at  
33 least 75% of reads, with a Phred quality score higher than 30, a minimum read depth of 5, a minimum  
34 mapping quality of 20 and a String Odd Ratio (SOR) of less than 3. We masked all positions that were  
35 covered by less than 5 reads. Further, we filtered out regions which are notoriously difficult to map  
36 and/or sequence, similarly to previous studies(3, 44). Namely, for *B. pertussis* we filtered out repeated  
37 regions (IS481, IS1002 and IS1663)(36), and phage regions using Phaster(45); for *M. tuberculosis*, we  
38 filtered out the functional categories "PE/PPE" or "insertion sequences and phages"(44). For *B.*  
39 *pertussis*, we also checked for recombination in our alignment using Gubbins(46). As a result, we  
40 obtained an alignment of 4701 SNPs for *B. pertussis* and 30533 SNPs for *M. tuberculosis*.

41

42

### 43 **Reconstruction of timed resolved phylogenies**

44 For each pathogen, we obtained timed-resolved phylogenies. For SARS-CoV-2 and H3N2, we used the  
45 NextStrain trees, accessed on 14 April 2023(38). For *B. pertussis* and *M. tuberculosis*, we reconstructed

46 the timed phylogenies specifically for this study, using the SNP-based alignments. We first built  
47 maximum-likelihood trees using IQ-tree(47), using a GTR+F+G substitution model. To assess the  
48 branch support, we used the ultrafast bootstrap approximation provided in IQ-tree, performing 1000  
49 replicates for each dataset with the bnni option to reduce the risk of overestimating the branch  
50 support(48).

51  
52 For *B. pertussis*, the time-tree was reconstructed using BEAST v1.10.4(49), under a GTR substitution  
53 model(18) accounting for the number of constant sites, a relaxed lognormal clock model(50) and a  
54 skygrid population size model(51). Three independent Markov chains were run for 150 000 000  
55 generations each, with parameter values sampled every 10,000 generations. Runs were optimized  
56 using the GPU BEAGLE library(52). Chains were manually checked for convergence (ESS values > 200)  
57 using the Tracer software(53). We manually removed a 10% burn-in.

58  
59 For *M. tuberculosis*, as all sequences were isolated in 2008-2010, we could not infer a clock rate, but  
60 instead, we used a previously estimated clock rate(54) of  $4.6 \times 10^{-8}$  mutations/site/year. We used the  
61 software Bactdating(55) to perform a bayesian reconstruction of the timed-tree. We used a fixed  
62 mean mutation rate, a relaxed clock rate and a constant effective population size. We ran the chain  
63 for 10,000,000 iterations and checked for convergence (ESS values > 200).

64  
65

## 66 **Index definition**

67 We developed an analytical framework that summarizes the changes in population composition in  
68 phylogenetic trees at every time point. Our framework builds on a genetic distance-based index, the  
69 Timed Haplotype Density (THD)(16), that measures the epidemic success of individual sequences in a  
70 dataset. This measure is based on the expectation that sequences sampled from an emerging, fitter,  
71 lineage will be phylogenetically closer than the rest of the population at that time. We extend this  
72 method to track population changes in phylogenetic trees through time.

73

74 We define the *Index* of each isolate  $i$  in its population at time  $t$  as:

$$75 \quad \text{Index}(i) = \sum_{d=0}^{\infty} D_i(d, t) \cdot b^d$$

76 [Eq. 1]

77 With  $D_i(d, t)$  the distance distribution (in number of mutations or evolutionary time) from the isolate  
78  $i$  to the rest of the population at that time  $t$  (Figure 1) and  $b^d$ , the kernel setting the weight of each  
79 distance  $d$ .  $b$  is the bandwidth,  $b \in [0,1]$ , which is a parameter to set, linked to the timescale. We  
80 compute this index on each node in a tree (internal and terminal).

81

82 The weight allows us to track lineage emergence dynamically, focusing on short distances between  
83 nodes (containing information about recent population dynamics) rather than long distances  
84 (containing information about past evolution). The kernel is governed by the bandwidth  $b$ , which is a  
85 parameter to set. As  $b$  is dimensionless, it is hard to set. Instead, we use the notion of *timescale* 50 to  
86 choose it: the TMRCA such that pairs of isolates with shorter TMRCAs account for 50% of the kernel  
87 density(16). This timescale is tailored to the specific pathogen studied and its choice will depend on  
88 the molecular signal, as well as the transmission rate.

89

90 Our definition is virtually the same as the one used by Wirth and colleagues(16), with two critical  
91 differences: instead of computing the index by summing on each isolate in the population we now  
92 sum over the pairwise distance distribution, and we consider the collection time of each sequence to  
93 only compute the distance from  $i$  to the rest of the population that is circulating at that time.

94

95 This index is similar to the Local Branching Index (LBI)(10), which is defined as total surrounding tree  
96 length exponentially discounted with increasing distance from the isolate  $i$ . In our case, rather than  
97 considering the tree length, we compute the distance between nodes.

98

99 This index definition enables us to write an expectation of the index dynamics over time, as theoretical  
100 pairwise distance distributions can be approximated for different populations.

101

102

### 103 **Linking the Index dynamics to population history.**

104 The pairwise distance distribution  $D_i(d, t)$ , or more generally  $D(d, t)$ , can be seen as the probability,  
105  $P_c(s = \frac{d}{\mu l}, t)$ , for any pair of sequences sampled at time  $t$ , to coalesce some time  $s = \frac{d}{\mu l}$  in the past,  
106 with  $\mu$  being the rate at which the pathogen accumulates mutations per site and per unit of time, and  
107  $l$  the length of its genome.

108

$$D(d, t) = P_c(s = \frac{d}{\mu l}, t)$$

109 Therefore, at any time point, writing the probability of coalescing in the past enables us to compute  
110 the index in the population. We can update equation 1:

111

$$Index(t) = \int_0^{\mu l t} P_c(\frac{u}{\mu l}, t) \cdot b^u du$$

112

[Eq. 2]

113 We note that at time  $t$ , the maximum number of mutations accumulated is equal to  $\mu l t$ . For simplicity,  
114 we assume a linear accumulation of mutations through time in all the analytical expressions, though  
115 one could consider that mutations accumulate randomly given a Poisson distribution with rate  
116  $1/(\mu l t)$ .

117

118 This probability  $P_c(s = \frac{d}{\mu l}, t)$  is closely linked to the effective population size. For example, in the  
119 simplest case of the structured coalescent process(17), if we consider two individuals from a constant  
120 population of size  $N_e$ , we can write their probability of coalescing some time  $s$  in the past as:

121

$$P_c(s = \frac{d}{\mu l}, t) = \frac{1}{K} \frac{1}{N_e} \exp(-\frac{s}{N_e}), \quad \text{if } s \leq t \Leftrightarrow d \leq \mu l t$$

122

$$P_c(s = \frac{d}{\mu l}, t) = 0, \quad \text{if } s > t \Leftrightarrow d > \mu l t$$

123

[Eq. 3]

124 With  $K$  the normalization constant, so that  $\int_0^{\infty} P_c(\frac{u}{\mu l}, t) du = 1$ .

125 In Figure S16, we show conceptually how, for different effective population sizes, the probability of  
126 coalescing changes, and how it impacts the index dynamics. Formal derivations are presented below  
127 in the supplementary text.

128

129

### 130 Index computation on timed tree with sequences sampled through time

131 We use equation 1 to compute the index of each node (internal or terminal) in a timed-phylogenetic  
132 tree. To do this, for each node  $i$ , we compute its distance to all the other nodes present in the tree at  
133 that time (red crossed on schematic below). All the nodes that fall within the interval of time  $[t_i -$   
134  $t_{wind}; t_i + t_{wind}]$  are considered to be circulating at the same time as  $i$ ; with  $t_i$  being the collection  
135 time of the node  $i$ , and  $t_{wind}$  the predefined time window width that is tailored to each pathogen. We  
136 also consider extant branches in the computation, as they are evidence of past circulation.

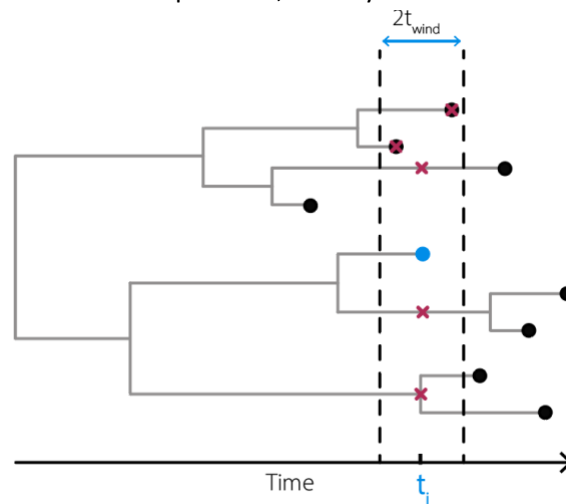

137

138

139 For computation efficiency, similarly to Wirth and colleagues(16), we then compute:

$$140 \quad \text{Index}(i) = \sum_{j \in \text{nodes}} I(t_j > t_i - t_{wind} \ \& \ t_j < t_i + t_{wind}) d(i, j) b^{d(i, j)}$$

141 Where  $\text{nodes}$  is the set of all nodes in the tree, and  $I$  is an indicator function.

142 This computation is efficient as it only requires i) the precomputation of the indicator function, ii) the  
143 precomputation of the distance matrix and iii) a matrix multiplication.

144

145 For the pathogens presented in our study we used:

- 146 - SARS-CoV-2: a timescale of 0.15 years, and a window of time  $t_{wind} = 15$  days
- 147 - H3N2: a timescale of 0.4 years, and a window of time  $t_{wind} = 0.25$  years
- 148 - *B. pertussis*: a timescale of 2 years, and a window of time  $t_{wind} = 1$  years
- 149 - *M. tuberculosis*: a timescale of 30 years, and a window of time  $t_{wind} = 15$  years

150

151 We illustrate the impact of the timescale on the index dynamics in Figure S17 on the global SARS-CoV-  
152 2 tree.

### 153 **Agnostic detection of lineages**

154 We develop a framework that is able to find the set of lineages in the tree that best explains the  
155 index dynamics. To do this, we build an algorithm based on generalized additive models (gam) that  
156 jointly uses the phylogenetic relationships between nodes in the tree and their index.

157

158 In this section, for modelling purposes, we define lineages as monophyletic clades formed by one  
159 internal node and all its descendants. Here, these lineages can overlap, meaning that some isolates  
160 can be included in multiple lineages. We assume the tree to be binary. For a rooted binary tree with  
161  $n$  terminal nodes, there are  $n - 2$  internal nodes that are not the root, and therefore  $n - 2$  lineages  
162 possibilities, which is substantial. To keep the algorithm tractable, we limit the potential list of lineages  
163 to those starting with a internal node that has at least  $N_{off}$  offspring, which is chosen. We note the  
164 set of internal nodes to test  $\Pi$ . Further, to increase the accuracy of the detection, we only consider  
165 internal nodes that have predefined characteristics:

- 166 - For *B. pertussis* and *M. tuberculosis*, as we constructed the bootstrap support of each node  
167 (see above), we only consider internal nodes that have a bootstrap support of at least 50% to  
168 be the potential start of lineages. This threshold is low, but effectively removes nodes that are  
169 not well supported.
- 170 - For SARS-CoV-2 and H3N2, instead of bootstrap support, we consider a minimum number of  
171 mutations. We only consider internal nodes that have a least 1 mutation on their directly  
172 upstream branch.

173

174 The log index of each lineage  $l$  is modelled using a cubic spline  $S_l(t, k)$  with a pre-defined number of  
175 knots  $k$ . This allows us to model the log index of each node  $i$ , sampled at time  $t_i$ , given the lineage  
176 that it belongs to:

$$177 \quad \log(\text{Index}_i) \sim \beta_0 + S_0(t_i, k) + \sum_{l=1}^L I(i \in l) S_l(t_i, k)$$

178 Where  $\beta_0$  is the intercept,  $L$  is the total number of lineages,  $S_0(t, k)$  and  $S_l(t, k)$  are penalized cubic  
179 regression splines with  $k$  knots(56). One 'null' spline  $S_0(t, k)$  is estimated to model the initial  
180 population, together with one spline for each of the  $L$  lineages. If  $L = 0$ , then no  $S_l(t, k)$  is estimated.  
181  $I()$  is the identity function.

182

183 Briefly, the algorithm runs as follows. We start by a null model  $M_0$  that fits the index dynamics with  
184 one spline  $S_0(t, k)$  (i.e. unstructured population with one single index dynamic,  $L = 0$ ). We store the  
185 deviance explained  $Dev_0$  by the model  $M_0$ . We then sequentially consider models with increasing  
186 complexity  $M_L$ : we start by first trying models with one lineage,  $L = 1$ . We go through the list of  
187 internal nodes  $\Pi$  that could be the start of a new lineage. When the deviance explained  $Dev_1$  by the  
188 best model  $M_1$  is increased compared to the one of previous null model  $Dev_0$ , we keep the lineage  
189 (effectively the node from  $\Pi$ ) that explains best the dynamics. We then continue this procedure for  
190 increasing  $L$ . For each number  $L$ , we go through the list of internal nodes  $\Pi$  that could be the start of  
191 a new lineage. When the deviance explained  $Dev_L$  by the model  $M_L$  is increased compared to the one  
192 of previous model  $Dev_{L-1}$ , we keep the lineage (effectively the node from  $\Pi$ ) that explains best the  
193 dynamics.

194

195 The algorithm is implemented in R v4.1.2, using the package mgcv v1.8(57) to implement the gam  
196 models.

197

198 As for any clustering algorithm, choosing the best number of lineages that describe the index dynamics  
199 is a challenging question. We took the approach of the elbow plot. We plot the deviances  $Dev_L$   
200 explained by each best model  $M_L$ , as a function of the number of lineages  $L$ . This approach enables us  
201 to see how well all the models are performing, and to choose the number  $L$  of lineages at which the  
202 deviance explained does not increase substantially anymore (Figure S18). From this selected best  
203 number of lineages  $L_{best}$ , we then compute the equivalent set of non-overlapping lineages presented  
204 in this paper (Figures 1-5 and S2). We make sure the minimum number of nodes per non-overlapping  
205 lineage is at least  $N_{min}$  by merging the small lineages to its closest phylogenetically.

206

207 For the pathogens presented in our study we found:

- 208 - SARS-CoV-2: 14 lineages, average number of sequences per group of 447, with a set minimum  
209 number of  $N_{min} = 10$
- 210 - H3N2: 20 lineages, average number of sequences per group of 147, with a set minimum  
211 number of  $N_{min} = 5$
- 212 - *B. pertussis*: 8 lineages, average number of nodes per group of 311, with a set minimum  
213 number of  $N_{min} = 30$
- 214 - *M. tuberculosis*: 12 lineages, average number of sequences per group of 181, with a set  
215 minimum number of  $N_{min} = 30$

216

217 To compare the automatic lineages found by our framework to those previously identified, we  
218 compute a contingency matrix  $C$ . Let  $U$  be the partition of the isolates by our framework, and  $V$  the  
219 partition based on literature. Each element  $C_{i,j}$  is the number of isolates in both clusters  $u_i$  and  $v_j$ . In  
220 Figure 2 we plot this matrix as a heatmap, normalized by column  $j$ . We computed the Adjusted Rand-  
221 Index (ARI) to measure the agreement between partitions, accounting for random clustering(21). A  
222 value of 1 corresponds to perfect agreement with previously identified lineages, whereas a value of 0  
223 would be expected if clusters were assigned at random.

224

225 We illustrate the impact of the timescale on the lineage detection in Figure S16 on the global SARS-  
226 CoV-2 tree.

227

228

### 229 **Quantifying the fitness of each lineage**

230 We developed a multinomial logistic model that takes into account the birth of lineages to fit the  
231 proportion of each lineage through time and quantify their fitness.

232

233 The proportion  $p_{\bullet,t}$  of sequences at time  $t$  from each lineage is computed as the number of nodes  
234 (internal and terminal) divided by the total number of nodes (internal and terminal) in the population  
235 at that time. This proportion  $p_{\bullet,t}$  is modelled by:

$$236 \quad p_{\bullet,t} = \text{softmax}(\log(\alpha_{\bullet}) + \beta_{\bullet}t)$$

237 With  $\alpha_{\bullet}$  being the vector of intercept, denoting the initial relative prevalence of each lineage in the  
238 population and  $\beta_{\bullet}$  the vector of relative growth rates of each lineage. We assume each lineage  $i$  has a



239 constant relative growth rate  $\beta_i$  in the population, i.e. each lineage has a constant relative fitness  
240 through time. We compute all the relative growth rates with reference to the oldest lineage.

241

242 We use a Laplace prior for the growth rate coefficient( $\beta$ ):

$$243 \quad \beta_{\bullet} \sim \text{Laplace}(0, 1)$$

244

245 We take into account lineage birth by only allowing  $p_{i,t}$ , the lineage  $i$  proportion in the population at  
246 time  $t$ , to be non-negative after the lineage's Most Recent Common Ancestor (MRCA). Formally, this  
247 is done by parameterizing  $\alpha_{\bullet}$  as follows. We divide the lineages into two types, either 'ancestral', or  
248 'non-ancestral':

249 - An 'ancestral' lineage is a lineage that is present at the beginning of the time series considered.  
250 The total number of ancestral lineages is noted  $G$ . For those lineages, we sample directly their  
251 starting proportions with prior:

$$252 \quad \alpha_i \sim \text{simplex}(G); \quad \text{if } i \in \text{ancestors}$$

253 - A 'non-ancestral' lineage is a lineage that appears after some time - for example the Omicron  
254 variant. For those lineages, we assume that their starting frequency, at the time of emergence,  
255 is a function of the proportion of their parents in the population at that time. Thus, we write:

$$256 \quad \alpha_i = \gamma_i p_{j,t_{MRCA i}}; \quad \text{if } i \notin \text{ancestors}$$

257 Where  $j$  is the parent lineage of lineage  $i$ ,  $p_{j,t_{MRCA i}}$  is the proportion of the parent lineage  $j$  at  
258 the time emergence  $t_{MRCA i}$  of the offspring lineage  $i$ , and  $\gamma_i$  is the share of the parent lineage  
259 that is becoming the new lineage. We sample  $\gamma_i$  with a strong prior as we expect that the  
260 starting proportion of new lineages should be small:

$$261 \quad \gamma_i \sim \text{beta}(1, 99); \quad \text{if } i \notin \text{ancestors}$$

262 Finally, we update the parent  $j$  proportion as follows:

$$263 \quad p_{j,t_{MRCA i}+\delta} = (1 - \gamma_i) p_{j,t_{MRCA i}}$$

264 While this parameterization is more complex than the previous efforts using a similar model(8), it  
265 enables us to take into account that lineages appear through time, which make the model more  
266 biologically relevant (e.g., by not estimating the proportion of Omicron in the population in 2020). We  
267 chose to parametrize the starting proportions of the new lineages as a function of their parent's  
268 proportions so that i) the model is biologically sound, i.e. the starting proportion of a new lineage  
269 cannot be greater than the one of its parent, and ii) the starting proportions are constrained by the  
270 proportion of their parents, which makes it statistically easier to fit.

271

272 We use a multinomial likelihood to fit the count of sequences per lineage through time  $y_{\bullet,t}$  :

$$273 \quad y_{\bullet,t} \sim \text{multinomial}\left(\sum_i y_{i,t}, p_{\bullet,t}\right)$$

274

275 We further computed the inferred real-time growth rate (i.e. fitness)  $r_i(t)$  of each lineage  $i$  in the  
276 population (Figure 3E-H), to control for the varying presence of all circulating lineages through time.  
277 Indeed, while our model estimates a constant fitness parameter for each lineage, their actual fitness  
278 through time depends on what other lineages are circulating at that time.

$$279 \quad r_i(t) = p_{i,t} \sum_{j \neq i} p_{j,t} (\beta_i - \beta_j)$$

280

281 These results are more useful compared to the usual presentation of the parameters, which by default  
282 display the relative fitness compared to the ancestral lineage, in this case 19A (the lineage that  
283 includes the first SARS-CoV-2 sequences isolated in Wuhan, China).

284  
285 The model was implemented in Stan, using the *cmdstanr* package(58). We ran this model on 3  
286 independent chains with 1,000 iterations and 50% burn-in for each pathogen. We used 2.5 and 97.5  
287 quantiles from the resulting posterior distributions for 95% credible intervals of the parameters.

288  
289 We fit the counts per lineage in windows of 1 month for SARS-CoV-2, 0.2 year for H3N2, 1 year for *B.*  
290 *pertussis* and 20 years for *M. tuberculosis*, with *t* counted in years for all pathogens.

291

292

### 293 **Defining mutations of each lineage**

294 We explored whether specific changes in the genomes were linked to lineage fitness by identifying  
295 lineage-defining mutations. We defined such mutations as:

- 296 - Mutations that are present in more than 80% of the nodes in that lineage
- 297 - While those mutations are not present in the set of defining mutations of the ancestral  
298 lineage.

299 For all pathogen, we reconstructed the mutations at each node in the trees using the ancestral state  
300 reconstruction implemented in the library ape. To maximize the correct assignment for nodes, we only  
301 consider nodes for which the state's probability was >0.9. Mutations were then classified as  
302 synonymous, non-synonymous, or extragenic. For *M. tuberculosis* and *B. pertussis* we also classified  
303 each mutation by functional category(36, 37).

304

305 We computed the density of lineage-defining mutations along the SARS-CoV-2 full genome and H3N2  
306 HA polyprotein with a kernel density estimate (Figure 4E-F). We used a gaussian kernel with a  
307 bandwidth of 50 base pairs (bp) for SARS-CoV-2, and a bandwidth of 2.5 amino acid (AA) for H3N2. For  
308 *B. pertussis* and *M. tuberculosis* we plot for each mutation the maximum proportion of that mutation  
309 that is present in the set of groups considered.

310

311 To assess the function relevance of the mutations identified for each pathogen (DataFiles S5-8), we  
312 compared them to the literature.

313 For SARS-CoV-2, we matched the amino acid substitution we found to the ones that Obermeyer  
314 and colleagues analyzed(8). The authors analyzed 6.4 million genomes up to January 20, 2022 and  
315 estimated the fitness effect of 2904 substitutions. Although our global dataset is from an extended  
316 period of time (up to 3 April 2023), 84% (N=156) of the lineage-defining mutations were analyzed by  
317 Obermeyer and colleagues.

318 For H3N2, we computed the proportion of positions that are lineage-defining within each HA  
319 polyprotein subunit, and antigenic sites(33, 34). A position is lineage-defining if it has at least one AA  
320 substitution that is lineage-defining. The proportion is computed as follows:

$$321 \quad \pi_L = \frac{\text{number of positions that are lineage – defining within } L}{\text{number of positions that are mutated within } L}$$

322 Where L is the set of positions to be analyzed (subunits or antigenic sites).

323 For the bacteria *B. pertussis* and *M. tuberculosis* we employ a similar metric, by grouping mutations  
324 by gene functional categories. We compute:

325 
$$\pi_F = \frac{\text{number of AA substitutions that are lineage – defining within } F}{\text{number of AA substitutions within } F}$$

326 Where  $F$  is the gene functional category considered(36, 37). As a sensitivity analysis, we also  
327 replicated this computation on synonymous nucleotide changes, as we expect these mutations to be  
328 neutral, and therefore not linked to any particular functional category (Figure S19). We found that,  
329 indeed, there was no particular functional category that had significantly more lineage-defining  
330 synonymous mutations than others, for both bacteria.

331  
332 To further check our findings visually, we plotted the lineage-defining mutations for each pathogen  
333 next to their phylogenetic trees (Figures S12-15). To make sure the figures were interpretable, we  
334 plotted only the mutations in the spike protein for SARS-CoV-2 (Figure S12), the HA1 subunit for H3N2  
335 (Figure S13), and the mutations defining lineages 1 and 2 for *M. tuberculosis* (Figure S14). For *B.*  
336 *pertussis*, we plotted all mutations (AA substitutions and promoter mutations) (Figure S15).

337  
338

### 339 **Robustness to sampling strategies**

340 To demonstrate the robustness to sampling biases in time, we conducted a sensitivity analysis using  
341 the global SARS-CoV-2 dataset. We selected two random sets of 150 sequences from the 3129  
342 sequences in our full dataset. We selected them either uniformly through time, or in a temporally  
343 uneven manner. To do so, we divided the sequences in 15 time-windows of equal length (79 days).  
344 For the uniform sampling, we included 10 sequences per time bin, random selected. For the biased  
345 sampling, we included the following number of sequences per bin (see insert on Figure 5B):

- 346 - windows 1 and 2: 1 sequence per bin;
- 347 - windows 3 to 5: 2 sequences per bin;
- 348 - windows 6 to 9: 25 sequence per bin;
- 349 - windows 10 to 15: 7 sequences per bin.

350 After selecting the sequences, we pruned from the tree the ones that were not selected. We then  
351 performed the same analysis as described above. We also compared the groups found.

352  
353

### 354 **Analysis of time to detection**

355 We explored how fast after emergence our framework was able to detect lineages. To do this we  
356 truncated our full global SARS-CoV-2 dataset every two weeks. Overall, we obtained 81 datasets. Two  
357 examples of the index dynamics on censored data on 2021.26 and 2022.50 are presented in Figure  
358 S20. We then re-ran the detection algorithm on each dataset. To obtain the best set of lineages  
359 automatically for each dataset, we chose the set at which the log deviance explained did not increase  
360 by more than 0.01%.

361  
362

### 363 **Simulation study to assess validity of our approach.**

364 To demonstrate the validity of our framework, we simulate trees for different population structures.  
365 We use the *sim2.bd.origin* function from the TreeSim package(59). It simulates trees based on a birth-  
366 death model, with set rates of speciation (birth,  $\lambda$ ) and extinction (death,  $\mu$ ). A constant effective  
367 population size can be simulated by  $\lambda = \mu$ . An exponentially growing effective population can be  
368 simulated by  $\lambda > \mu$ . To simulate a tree with an emerging lineage, we first simulate separately two

369 trees, one with constant effective population size, and one with an exponentially growing effective  
370 population size. Then, we randomly select one tip from the first tree and use this tip as the root of the  
371 second tree.

372 In Figure S21, we present those simulations, for three types of effective population sizes: constant,  
373 growing, and structured with an emerging lineage. We compare the simulation obtained with the  
374 formal expected dynamics (see derivations below). Overall, the simulations verify the validity of our  
375 approach. Parameters used: time window: 2 years, timescale: 1 year, mutation rate: 4 mutations per  
376 year.

377  
378 We also reproduced sampling bias to check that our formal expected dynamics are correct even in  
379 that case. We sampled the sequences generated either taking 10% of the sequences from year 2-8 or  
380 only sequences from years 4-6 and 8-10 (and not years 1-3 or 6-8), mimicking common surveillance  
381 system biases. In Figure S22, we present those simulations, with 50 replicates each time. Overall, the  
382 simulations verify the validity of our approach. Parameters used: time window: 2 years, timescale: 1  
383 year, mutation rate: 4 mutations per year.

384  
385

### 386 **Expected behavior of the index in a constant effective population size**

387 In the simplest case of the structured coalescent process(17), if we consider two individuals from a  
388 population of constant size  $N_e$ , we can write their probability of coalescing some time  $s$  in the past as  
389 (Figure S12C):

$$390 \quad P_c(s = \frac{d}{\mu l}, t) = \frac{1}{K} \frac{1}{N_e} \exp(-\frac{s}{N_e}), \quad \text{if } s \leq t \Leftrightarrow d \leq \mu l t$$

$$391 \quad P_c(s = \frac{d}{\mu l}, t) = 0, \quad \text{if } s > t \Leftrightarrow d > \mu l t$$

[Eq. 3]

393 With  $K$  the normalization constant, so that  $\int_0^\infty P_c(\frac{u}{\mu l}, t) du = 1$ .

$$394 \quad K = \mu l (1 - \exp(-\frac{t}{\mu l N_e}))$$

395

396 We can plug Equation 3 in the index definition from Equation 2, making sure we takes  $= \frac{d}{\mu l} \Leftrightarrow d =$   
397  $s\mu l$ . After simplification it follows that:

$$398 \quad Index(t) = \frac{(b \cdot \exp(-\frac{1}{\mu l N_e}))^{\mu l t - 1}}{(\mu l N_e \ln(b) - 1) (1 - \exp(-\frac{t}{N_e}))}, \quad t > 0$$

[Eq. 4]

400 Which is the behavior of the index as a function of time, in a constant population size.

401  
402

### 403 **Expected behavior of the index in a varying population size**

404 Following the work of Griffiths and Tavaré (18) on the coalescent process in varying population sizes,  
405 we can further derive the index in more complex population dynamics. We set the effective population  
406 size of our lineage to  $N_e(t)$ , which can vary through time. We can define the population-size intensity  
407 function  $\Lambda$  by (18)(19):

$$408 \quad \Lambda_t(s) = \int_0^s \frac{ds'}{N_e(t - s')}, \quad t \geq s > 0$$

409 We assume that  $\Lambda(\infty) = \infty$ , so that each pair of individuals may be traced back to a common ancestor  
 410 with probability one (18). The density  $\lambda$  of  $\Lambda$  is given by (18):

$$411 \quad \lambda_t(s) = \frac{1}{N_e(t-s)}, \quad t \geq s > 0$$

412 It follows that  $P_c(s, t)$ , i.e. the probability of waiting  $s$  time to have the first coalescent event is:

$$413 \quad P_c(s, t) = \lambda_t(s) \exp(-\Lambda_t(s)), \quad t \geq s > 0$$

414 We can find back Equation 3, by taking  $s = \frac{d}{\mu}$  and plugging in a constant population size  $N_e(t) = N_e$ :

$$415 \quad \Lambda_t(s = \frac{d}{\mu l}) = \frac{d}{\mu l N_e}; \quad \lambda_t(s = \frac{d}{\mu l}) = \frac{1}{N_e}$$

$$416 \quad P_c(s = \frac{d}{\mu l}, t) = \frac{1}{K} \frac{1}{N_e} \exp(-\frac{d}{\mu l N_e}), \quad t \geq \frac{d}{\mu l} > 0$$

417 With  $K$  the normalization constant. Next, we consider the case of exponentially varying population  
 418 size.

419

420

421 **Expected behavior of the index in an exponentially growing effective population size.**

422 We set:  $N_e(t) = N_0 \cdot e^{rt}$ , with  $N_0$  the initial population size and  $r$  the rate at which the population is  
 423 growing (Figure S12F). We assume  $r > 0$ . We can then define the new  $\lambda_t(s)$  and  $\Lambda_t(s)$ :

$$424 \quad \Lambda_t(s) = \frac{1}{N_0 r} e^{-rt} (e^{rs} - 1)$$

425 And:

$$426 \quad \lambda_t(s) = \frac{1}{N_0} e^{r(s-t)}$$

427 So that:

$$428 \quad P_c(s = \frac{d}{\mu l}, t) = \frac{1}{K} \frac{1}{N_0} e^{r(s-t)} \exp\left(\frac{1}{N_0 r} e^{-rt} (1 - e^{rs})\right), \quad \text{if } t \geq s > 0$$

$$429 \quad P_c(s = \frac{d}{\mu l}, t) = 0, \quad \text{if } t < s$$

430 [Eq. 8]

431 With  $K$  the normalization constant so that  $\int_0^\infty P_c(\frac{u}{\mu l}, t) du = 1$ .

432 Therefore, we can plug Equation 8 in the index definition from Equation 2, which leads to:

$$433 \quad \text{Index}(t) = \frac{1}{K} \int_0^{\mu l t} \frac{1}{N_0} e^{r(\frac{u}{\mu l} - t)} \exp\left(\frac{1}{N_0 r} e^{-rt} (1 - e^{r\frac{u}{\mu l}})\right) \cdot b^u du, \quad t \geq \frac{d}{\mu l} > 0$$

434 [Eq. 9]

435 This sum does not have a closed-form expression. However, it can be numerically approximated  
 436 (Figure S12H).

437

438

439 **Expected index behavior for newly emerging lineage**

440 We can note that in the case of a varying population size (e.g. exponentially varying), the index is  
 441 dependent on  $r$ , the rate at which the population size is varying.

442

443 We can derive the index in structured populations that are more complex. For example, we consider  
 444 here the case of a new lineage expanding in a population (schematic below). Let  $Pop_A$  be the ancestral  
 445 population (schematic below, in gray), with constant effective population size  $N_A$ , and  $Pop_B$ , an  
 446 offspring from  $Pop_A$  (schematic below, in green), which appeared at time  $t_B$ . At time  $t_B$ , the effective

447 population size  $N_B(t)$  of  $Pop_B$  is  $N_{B_0}$ . We assume that the  $Pop_B$  is growing exponentially ( $N_B(t) =$   
 448  $N_{B_0} \exp(rt)$ ) through time with rate  $r > 1$ .

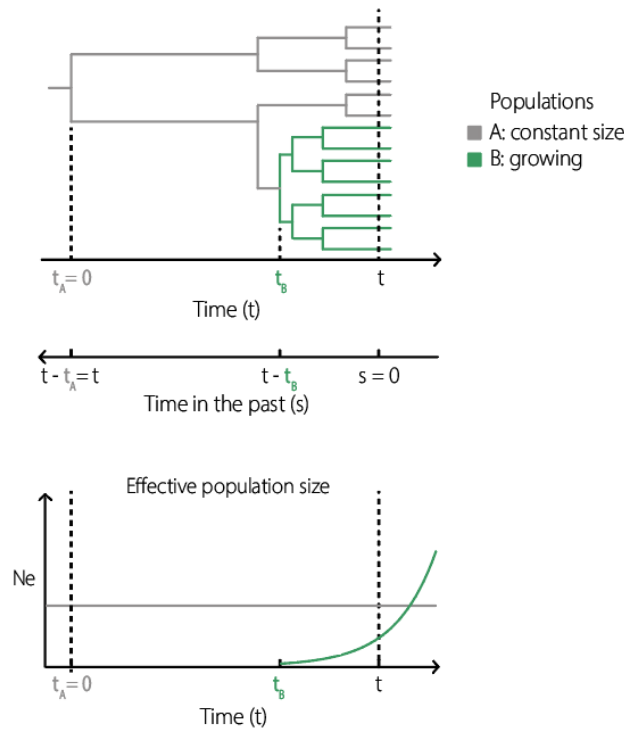

449 We now write the index of each population. We assume that the appearance of population B has a  
 450 negligible impact on the index of the individuals sampled from population A. The effective size of  
 451 population A is constant through time, therefore we can use Equation 4:  
 452

453 
$$Index_{Indiv\ in\ Pop\ A}(t) = \frac{(b \cdot \exp(-\frac{1}{\mu l N_A}))^{\mu l t} - 1}{(\mu l N_A \ln(b) - 1) (1 - \exp(-\frac{t}{N_A}))}, \quad t \geq 0$$

454 Population B is growing exponentially, within population A, therefore writing the index of individuals  
 455 sampled from this population is more complex. Let's consider an individual sampled from population  
 456 B. Its probability to coalesce with the rest of the population can be separated in two cases:  
 457

- 458 - It coalesces with an individual from population B, with probability  $P_{C,B \rightarrow B}(s, t)$
- 459 - Or it coalesces with an individual from population A, with probability  $P_{C,B \rightarrow A}(s, t)$

460 The total population through time is:  $N_{tot}(t) = N_A + N_B(t)$ .

461 Therefore, the probability of an individual sampled from population B to coalesce with another  
 462 individual in the population is:

463 
$$P_{C,B \rightarrow pop}(s, t) = \frac{N_B(t)}{N_{tot}(t)} P_{C,B \rightarrow B}(s, t) + \frac{N_A}{N_{tot}(t)} P_{C,B \rightarrow A}(s, t)$$
  
 464 [Eq. 10]

465 We can note that  $P_{C,BB}(s, t)$  exists only for  $t > t_B$  (otherwise population B does not exist yet) and  
 466  $t - t_B \geq s \geq 0$ , and  $P_{C,BA}(s, t)$  exists only for  $s \geq t - t_B$ .

467 First, let's write  $P_{C,B \rightarrow B}(s, t)$ . As population B is growing exponentially, we can re-use Equation 9:

468 
$$P_{C,B \rightarrow B}(s = \frac{d}{\mu l}, t) = \frac{1}{N_{B_0}} e^{r(s-t)} \exp\left(\frac{1}{N_{B_0} r} e^{-rt} (1 - e^{rs})\right), \quad t \geq t_B \text{ and } t - t_B \geq s \geq 0$$
  
 469 [Eq. 11]

470

472 Second, let's write  $P_{C,B \rightarrow A}(s, t)$ . We note that this probability only exists for  $s \geq t - t_B$ , and the size  
473 of population A is constant. So we can rescale this probability:

$$474 \quad P_{C,B \rightarrow A}(s, t) = P_{C,A}(s - t_B, t)$$

475 We can note that we already wrote this probability earlier in equation 3, so it follows that:

$$476 \quad P_{C,B \rightarrow A}(s, t) = \frac{1}{N_A} \exp\left(-\frac{s}{N_A}\right), \quad \text{if } s - t_B > 0$$

477 [Eq. 12]

478 We can now plug Equations 11 and 12 into Equation 10, to obtain the index of individuals sampled  
479 from population B:

$$480 \quad \text{Index}_{\text{Indiv in PopB}}(t) = \frac{1}{K} \left( \frac{N_B(t)}{N_{\text{tot}}(t)} \int_0^{\mu l(t-t_B)} \frac{1}{N_{B_0}} e^{r(\frac{u}{\mu l} - t)} \exp\left(\frac{1}{N_{B_0} r} e^{-r(t-t)(1 - e^{r\frac{u}{\mu l}})}\right) \cdot b^u \, du + \right. \\ 481 \quad \left. \frac{N_A}{N_{\text{tot}}(t)} \int_{\mu l(t-t_B)}^{\mu l t} \frac{1}{N_A} \exp\left(-\frac{1}{N_A} \cdot \frac{u}{\mu l}\right) \cdot b^u \, du \right), \quad t \geq t_B > 0$$

482 [Eq. 13]

483 With  $K$  the normalization constant so that  $\int_0^\infty P_{C,B}\left(\frac{u}{\mu l}, t\right) \, du = 1$ .

484 Similarly to Equation 9, this Equation does not have a closed-form expression. However, it can be  
485 numerically approximated. Further, we can note that considering only two different populations  
486 already makes the index mathematically hard to track, at least without simplifying assumptions.

## Supplementary figures

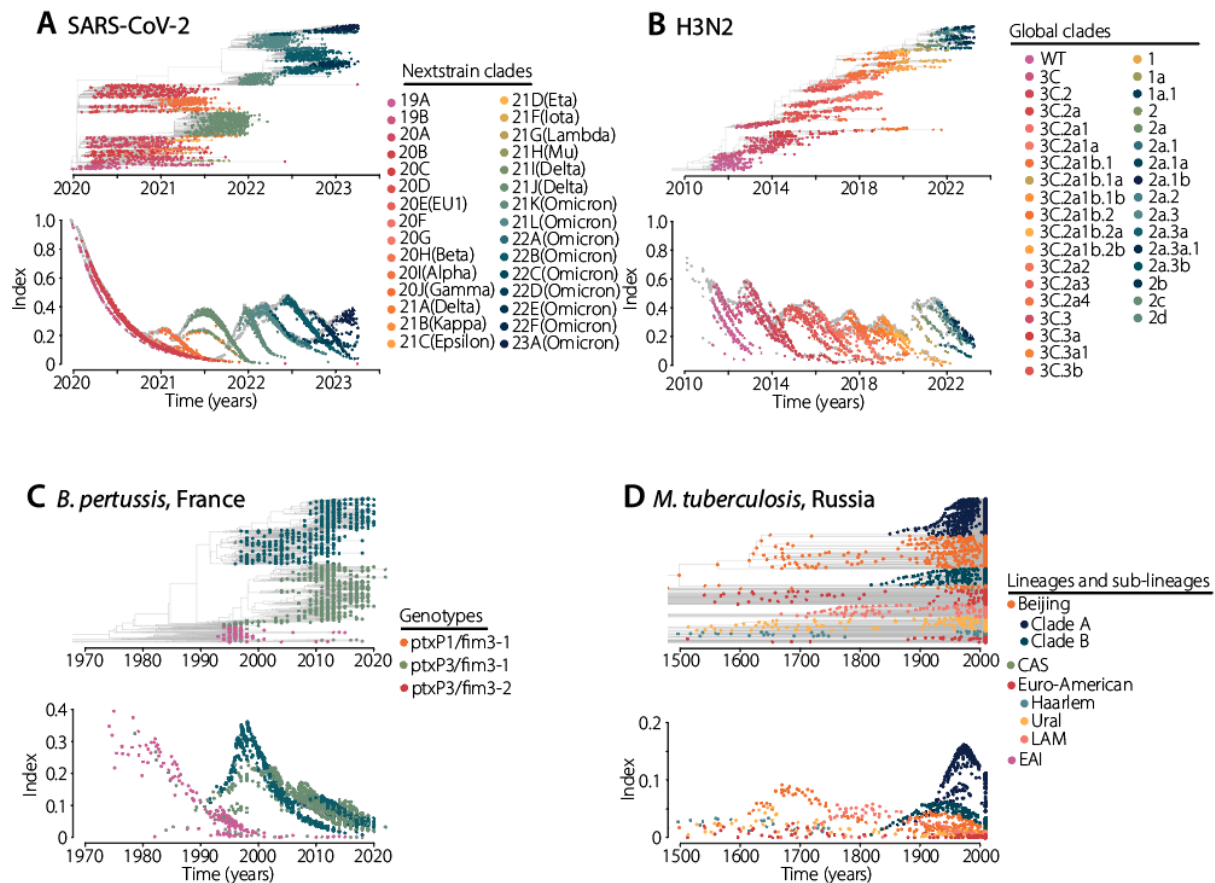

**Figure S1: Index dynamics colored by known lineages**

Similarly Figure 1B-E, for each pathogen, we present the index dynamics computed at each node (terminal or internal). Here colors represent the different known clades, genotypes, or lineages (see legend on the side). For *M. tuberculosis*, LAM denotes the Latin American-Mediterranean lineage, EAI denotes the East African Indian lineage and CAS denotes the Central Asian Strain lineage.



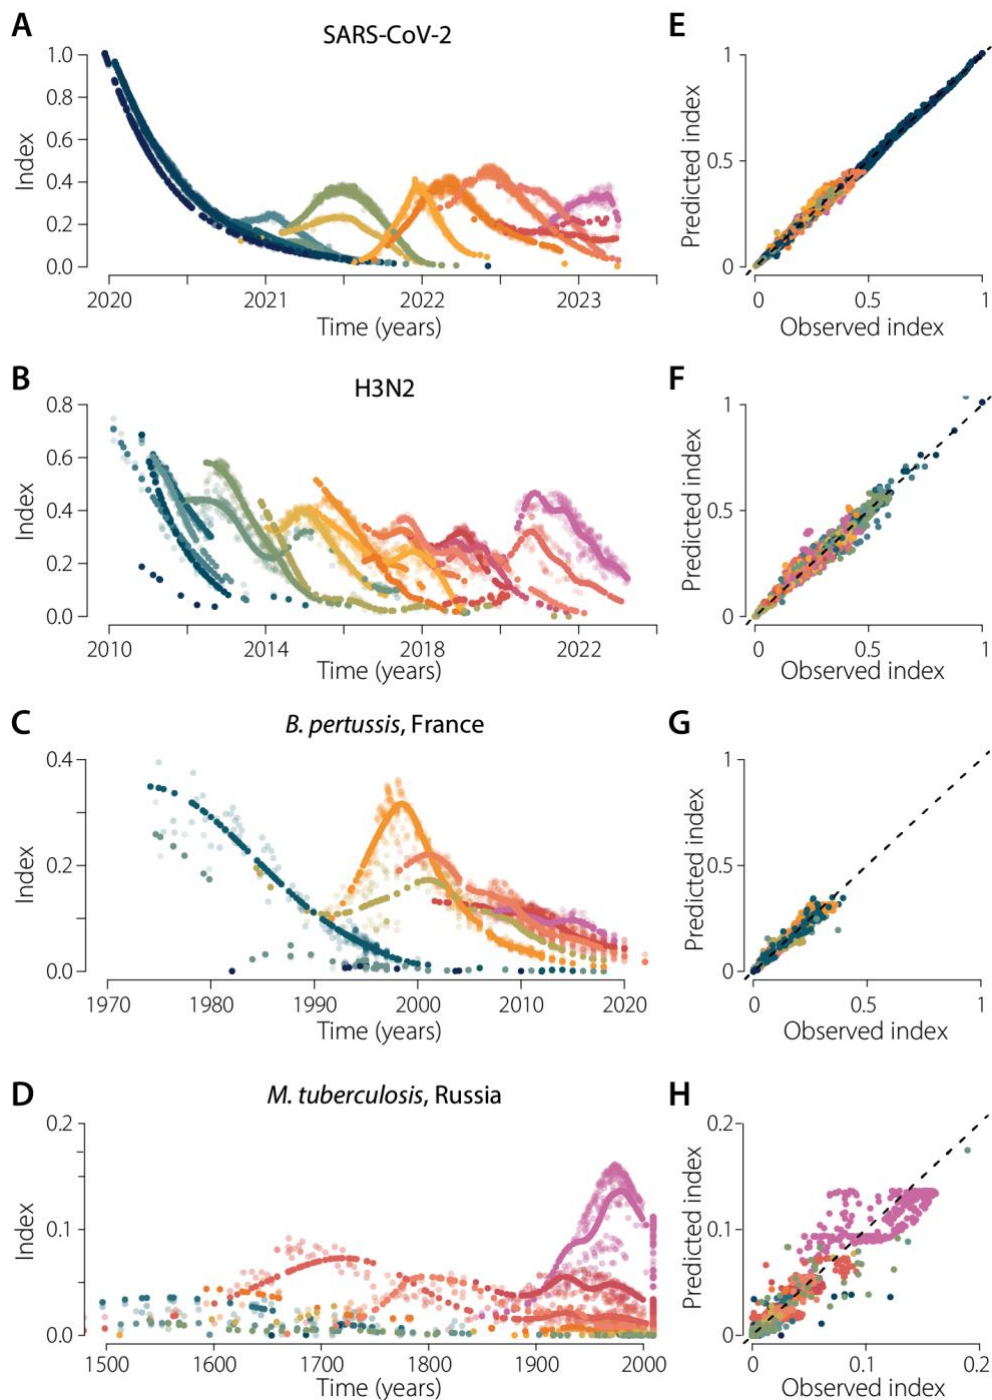

**Figure S2: Lineage detection based on index dynamics for each pathogen.**

**(A-D)** For each pathogen we present model fits of the index dynamics using the best set of lineages. Solid dots represent the model prediction. Shaded dots represent the data. **(E-F)** Predicted versus observed index. The dashed lines denote identity lines. For each pathogen, colors represent the different lineages identified by their different index dynamics (same colors as in Figures 1-4).

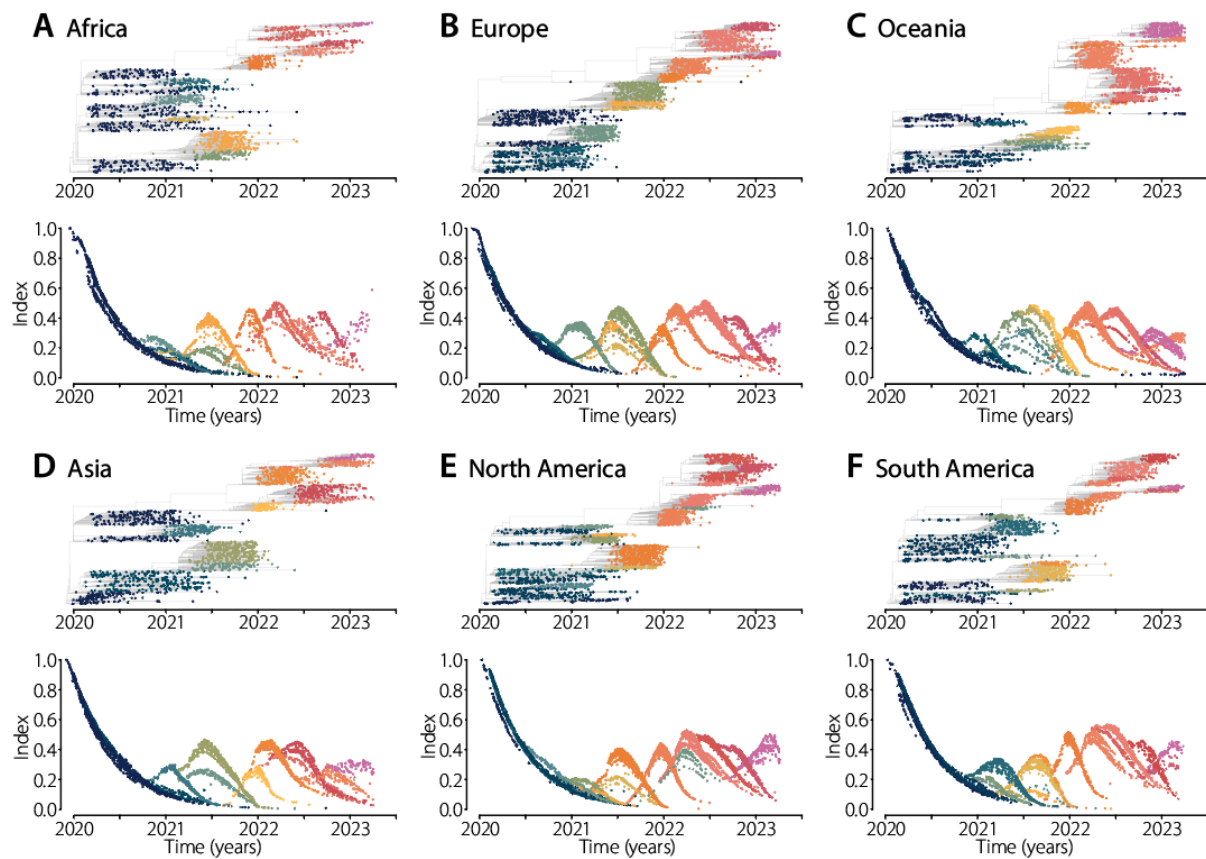

**Figure S3: Index dynamics of SARS-CoV-2 across continents**

For each continent, we present the index dynamics computed at each node (terminal or internal). Colors represent the different lineages identified by their different index dynamics. Timed-resolved phylogenies for each continent were obtained from NextStrain, accessed on 14 April 2023(38).

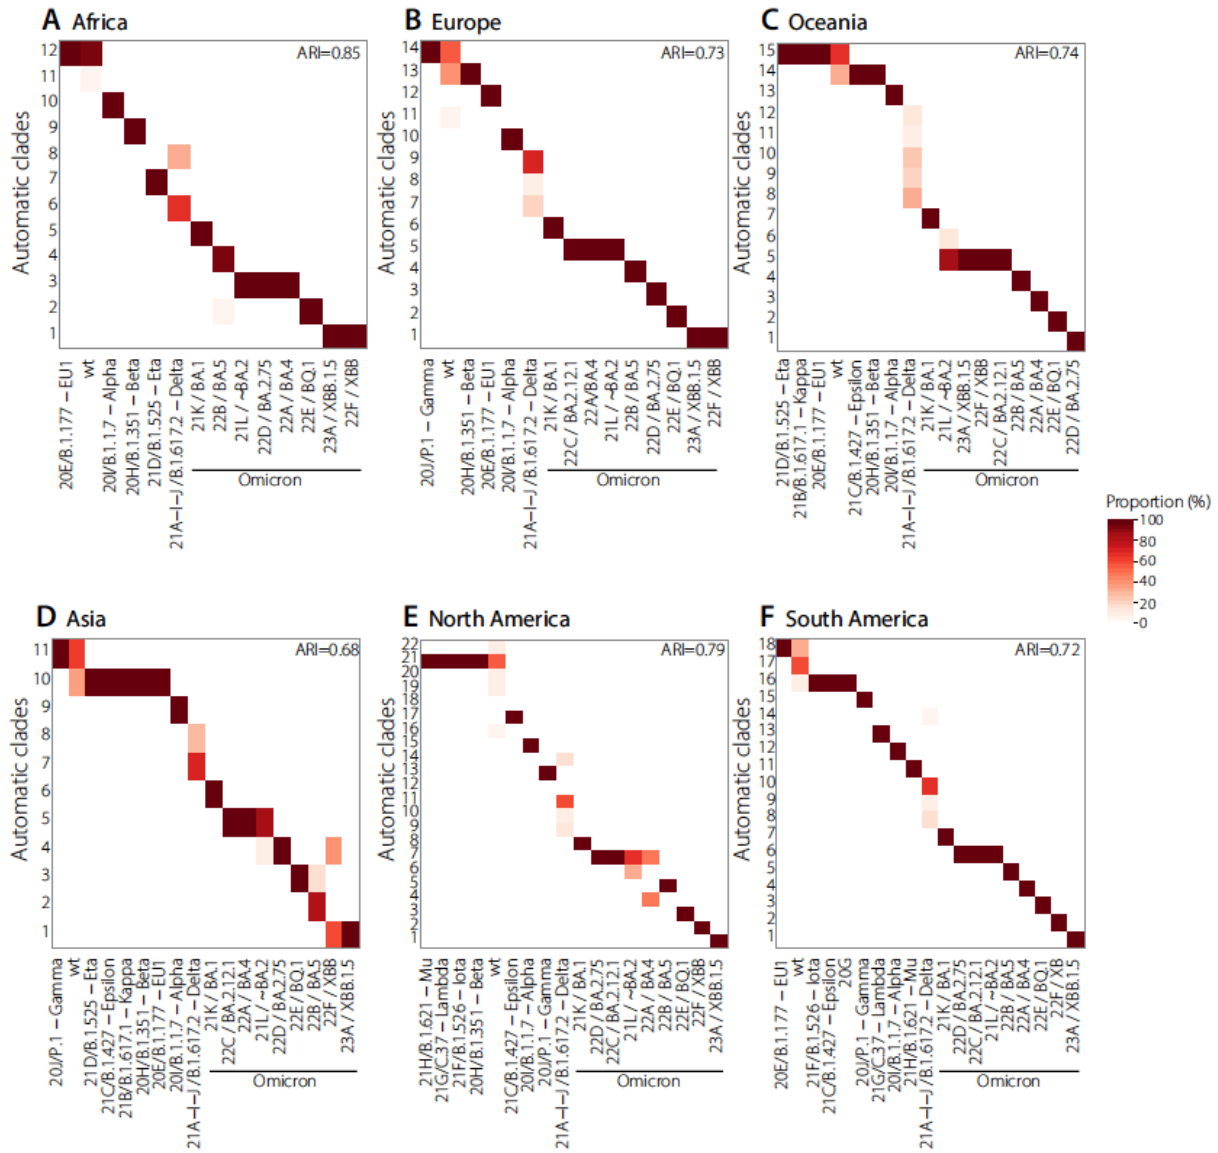

**Figure S4: SARS-CoV-2 lineages identified across continents**

For each continent, we present a heatmap comparing the known clades identified by NextStrain (x-axis) to the automatic clades found by our framework (y-axis). Darker colors represent more agreement between both classifications.

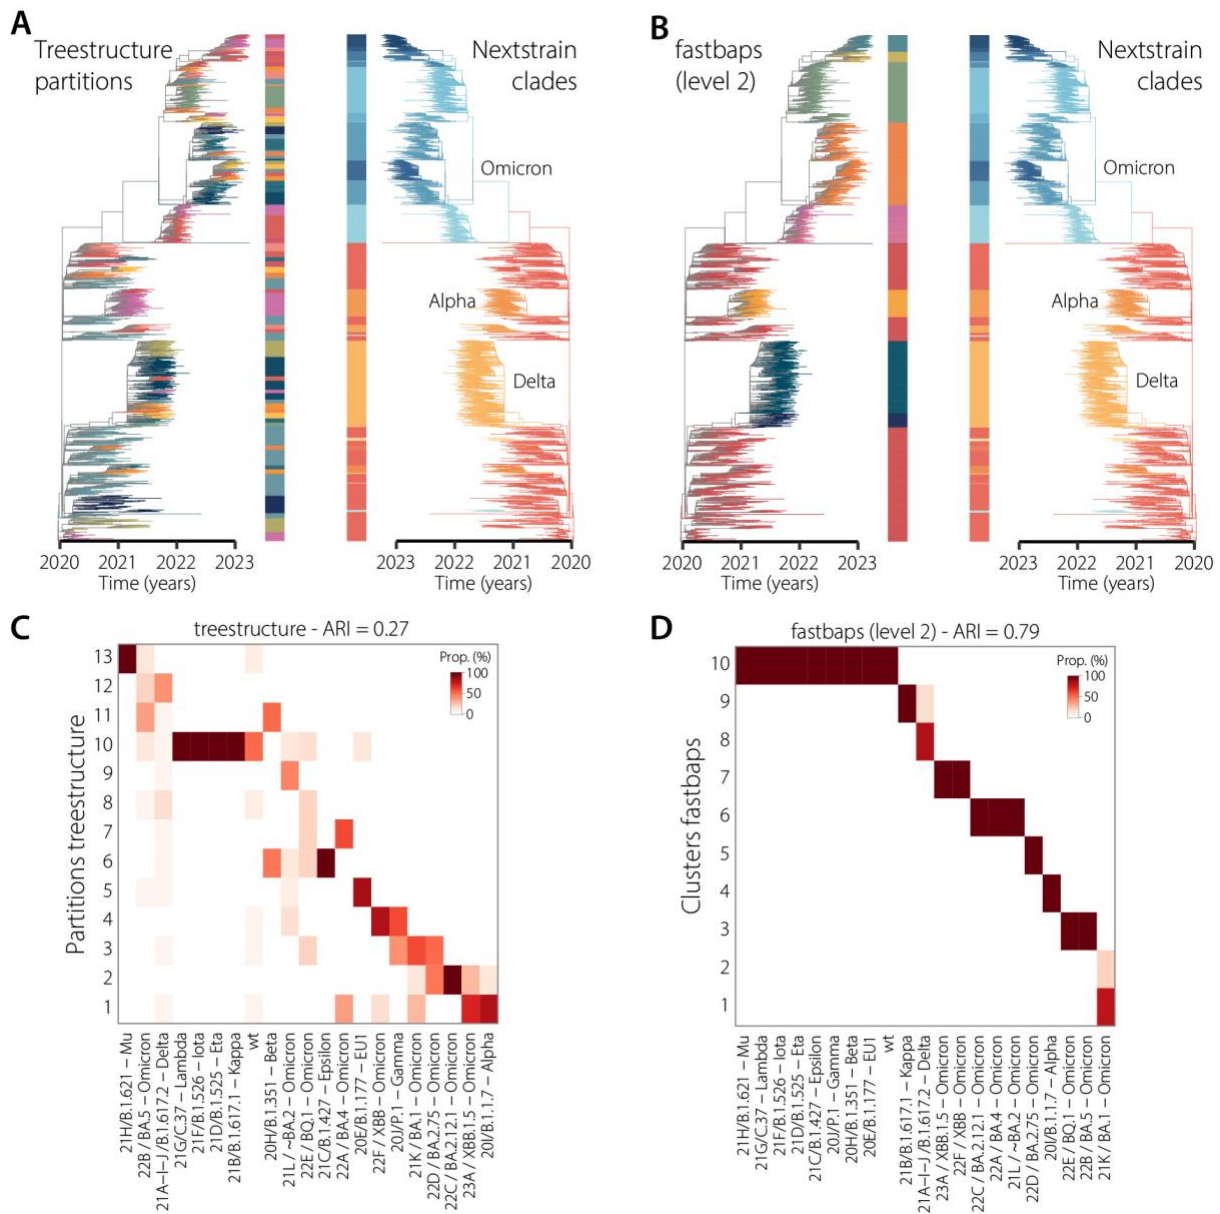

**Figure S5: SARS-CoV-2 lineages identified with treestructure and fastbaps**

**(A-B)** Global SARS-CoV-2 trees colored by the lineages identified with treestructure (A), or fastbaps (B). **(C-D)** We compare the lineages identified with either algorithm (y-axis) to the NextStrain clades (x-axis). Darker colors represent more agreement between both classifications.

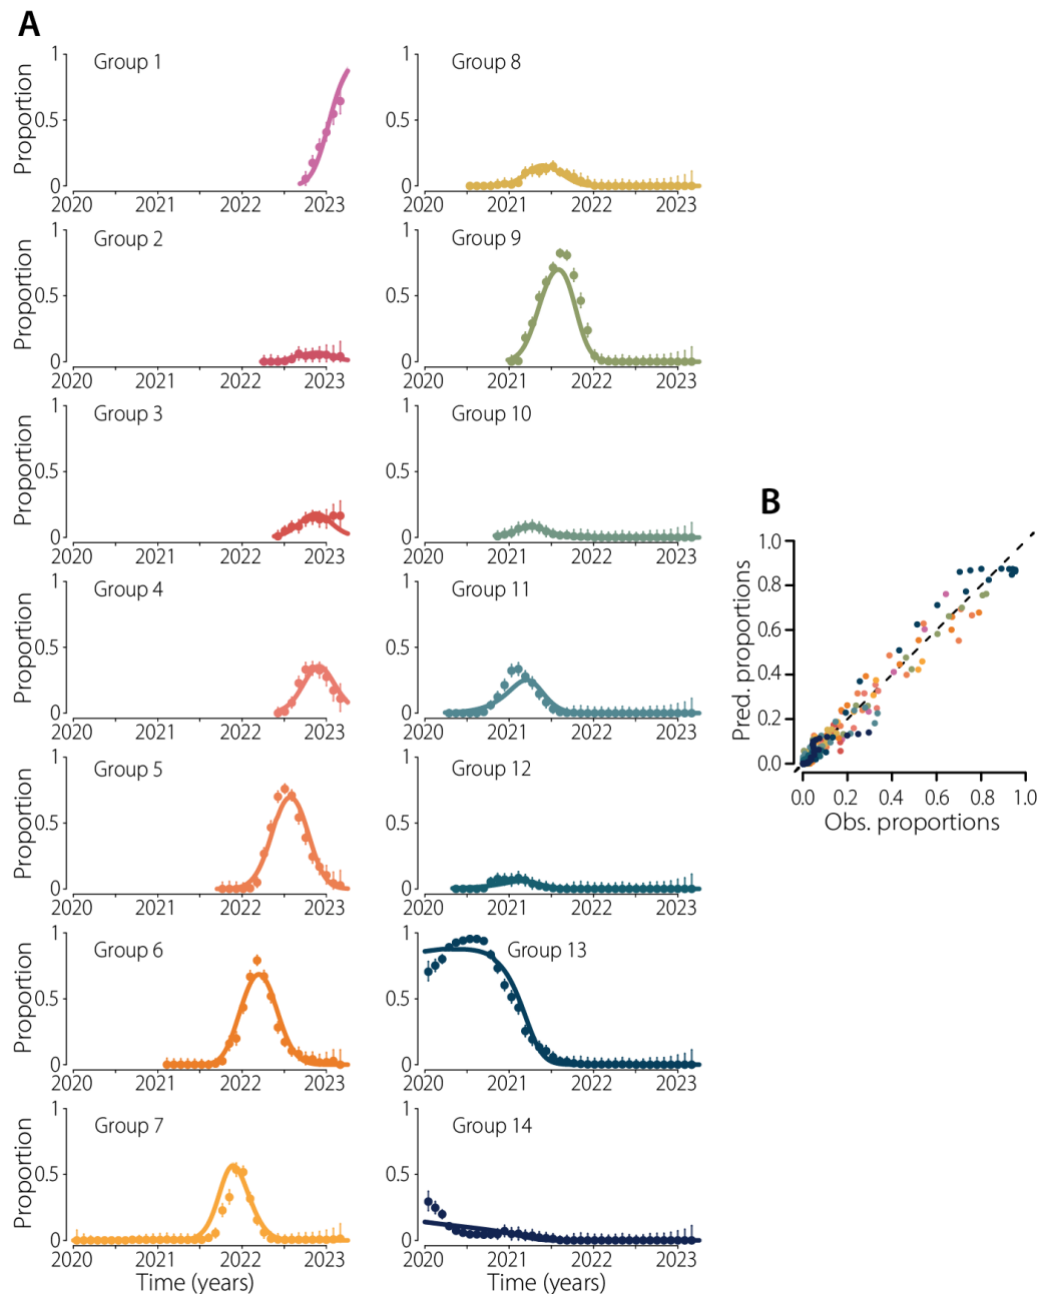

**Figure S6: Fitness model fits for all lineages of SARS-CoV-2**

**(A)** Fits of the proportion of all the SARS-CoV-2 lineages. Colored dots represent data, bars denote 95% confidence intervals. Colored lines and shaded areas represent the median and 95% credible interval of the posterior. **(B)** Predicted versus observed proportions.

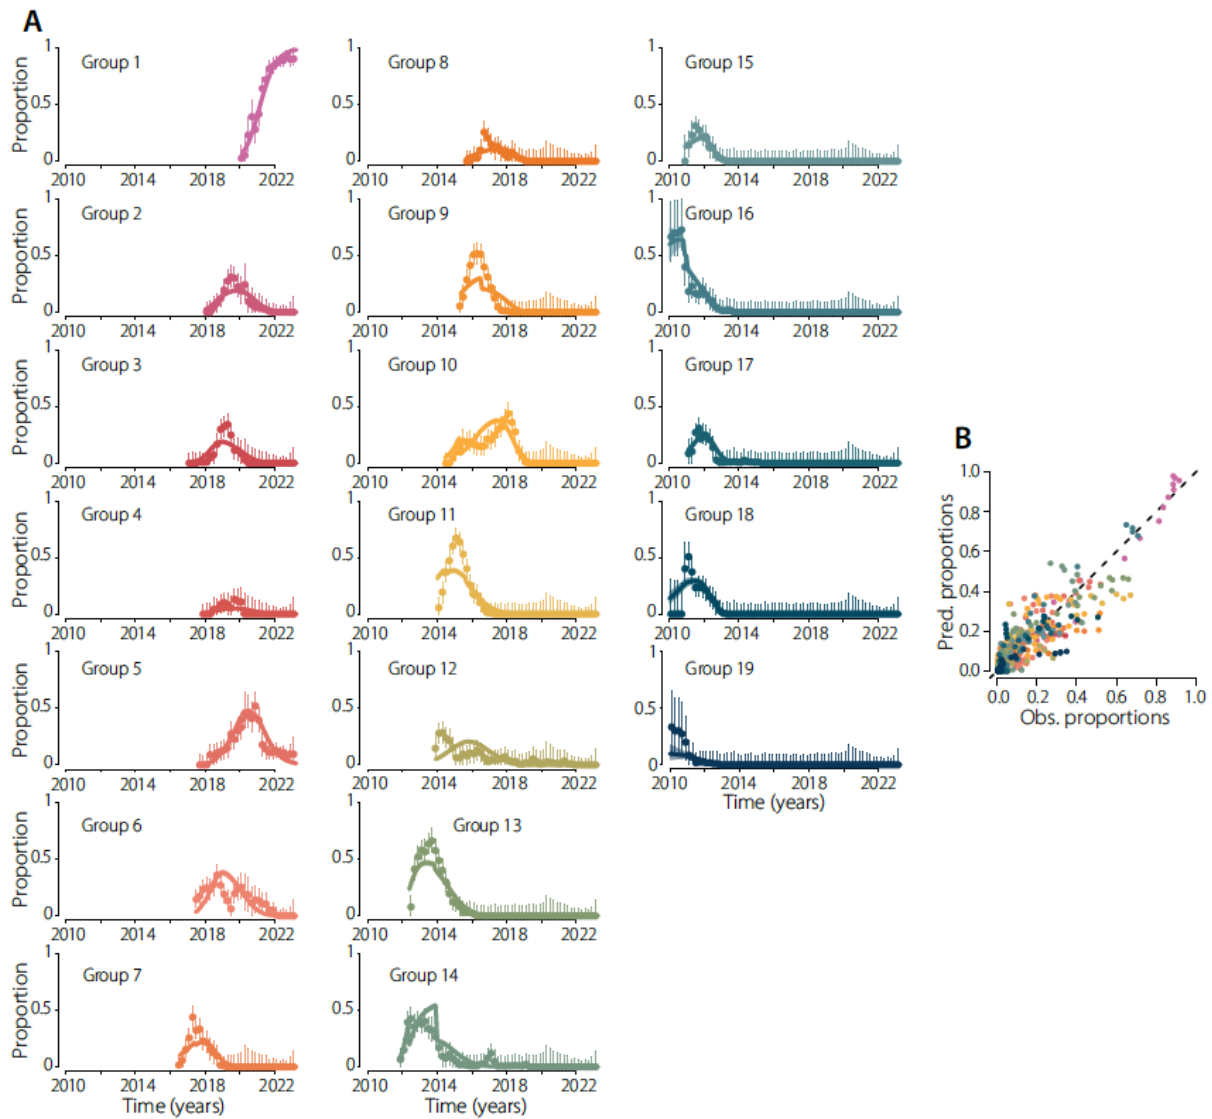

**Figure S7: Fitness model fits for all lineages of H3N2**

**(A)** Fits of the proportion of all the H3N2 lineages. Colored dots represent data, bars denote 95% confidence intervals. Colored lines and shaded areas represent the median and 95% credible interval of the posterior. **(B)** Predicted versus observed proportions.

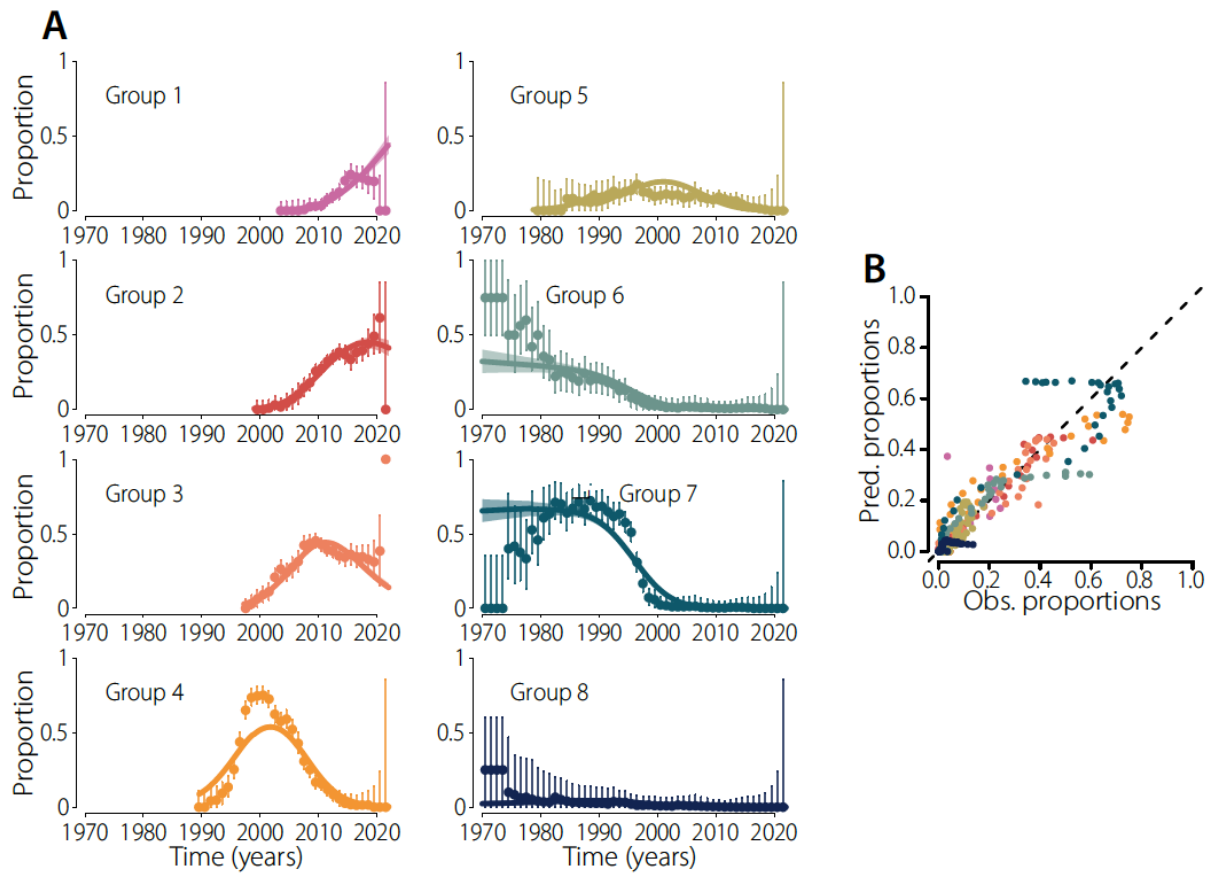

**Figure S8: Fitness model fits for all lineages of *B. pertussis***

**(A)** Fits of the proportion of all the *B. pertussis* lineages. Colored dots represent data, bars denote 95% confidence intervals. Colored lines and shaded areas represent the median and 95% credible interval of the posterior. **(B)** Predicted versus observed proportions.

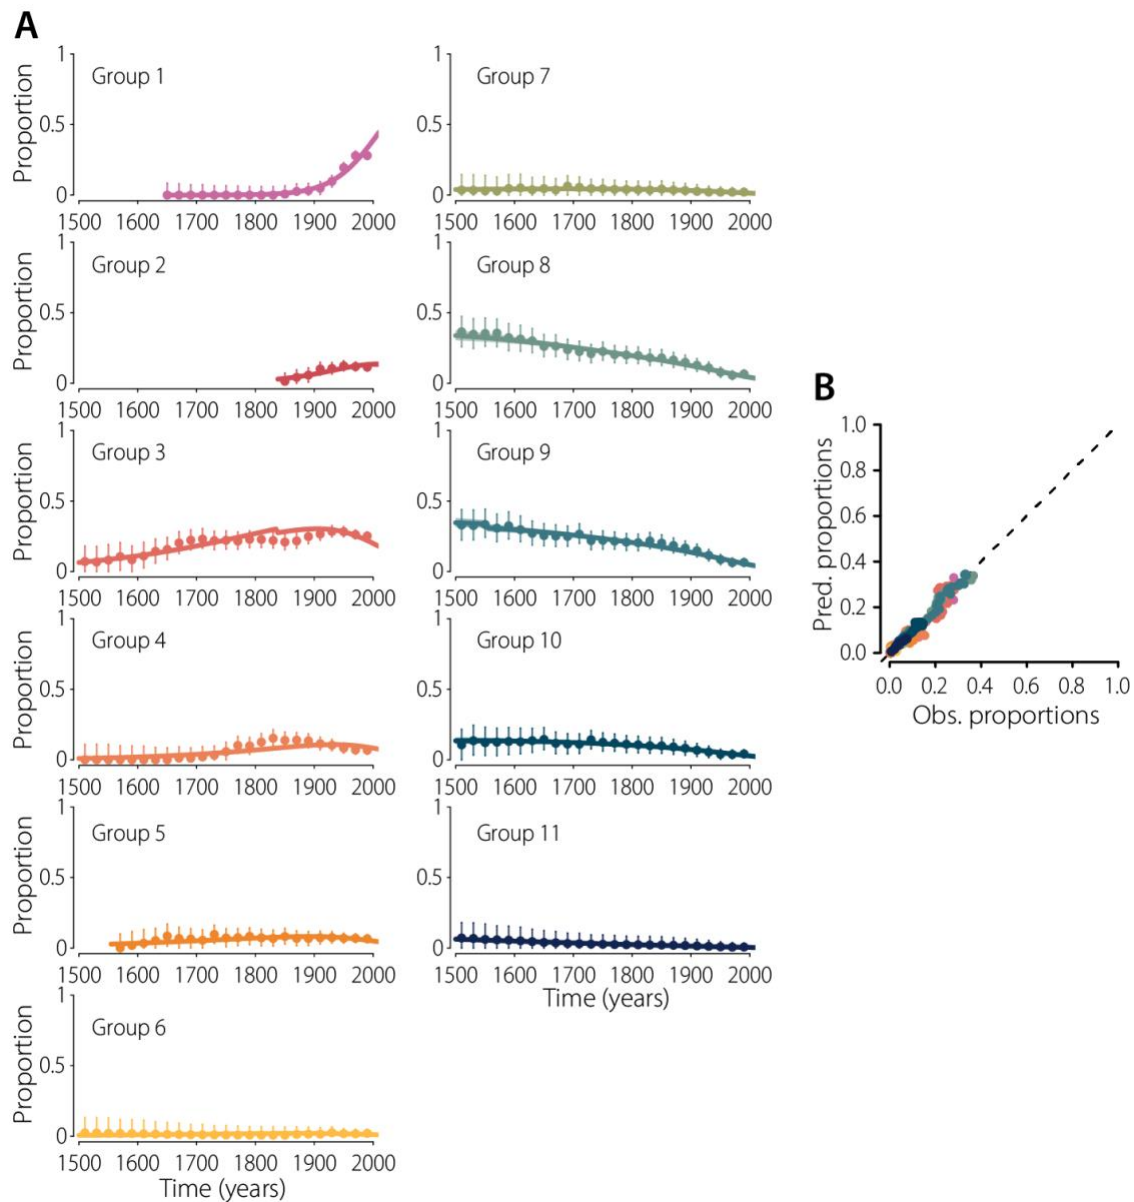

**Figure S9: Fitness model fits for all lineages of *M. tuberculosis*.**

**(A)** Fits of the proportion of all the *M. tuberculosis* lineages. Colored dots represent data, bars denote 95% confidence intervals. Colored lines and shaded areas represent the median and 95% credible interval of the posterior. **(B)** Predicted versus observed proportions.



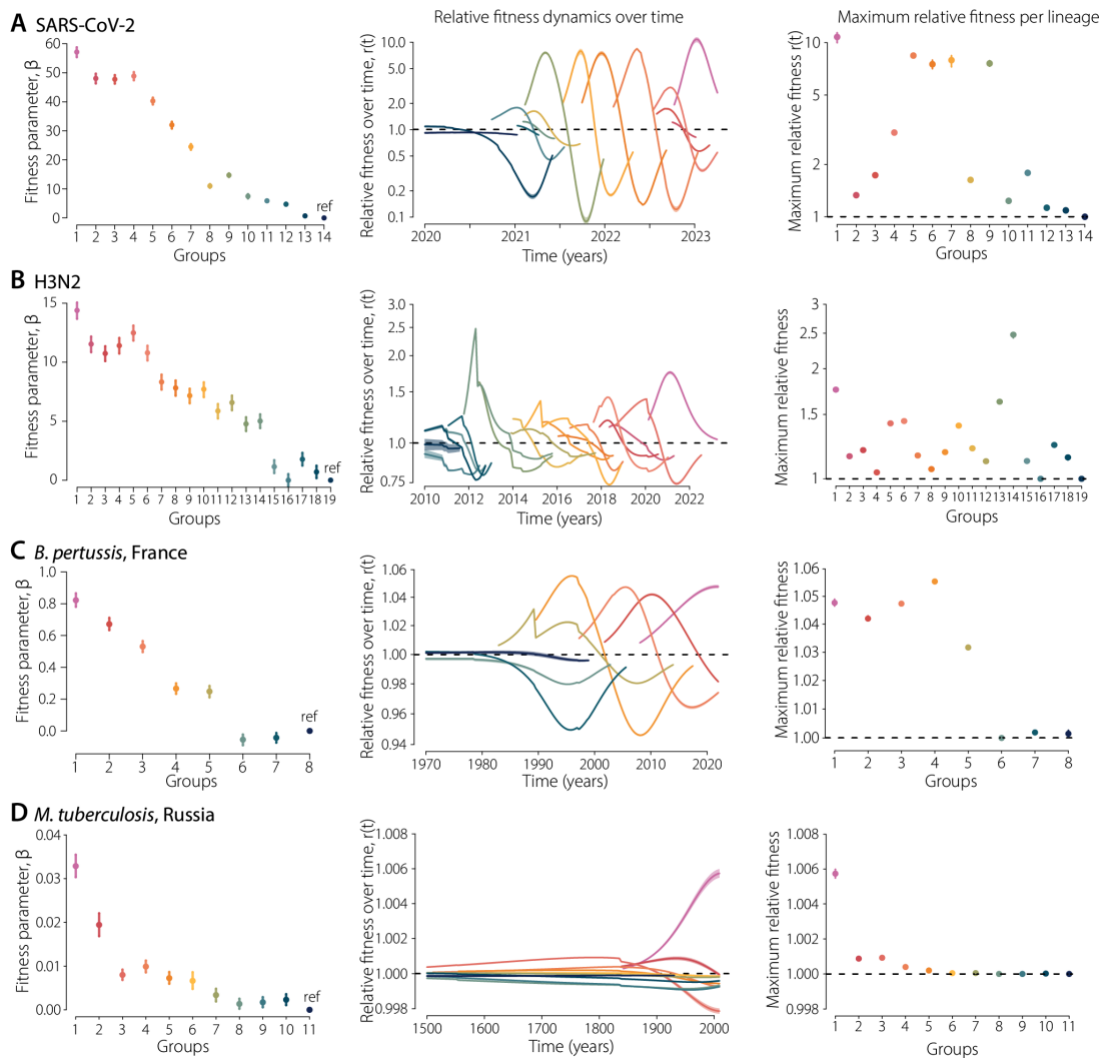

**Figure S10: Fitness estimates for all pathogen lineages**

For each pathogen we present the estimated fitness of each of their lineages. From left to right: Fitness parameter  $\beta$  for each lineage; Relative fitness dynamics overtime  $r(t)$ ; maximum relative fitness per lineage. Dots represent median estimates for each lineage, bars denote 95% credible interval of the posterior. Lines and shaded areas represent the median and 95% credible interval of the posterior. Colors represent the different lineages identified for each pathogen.

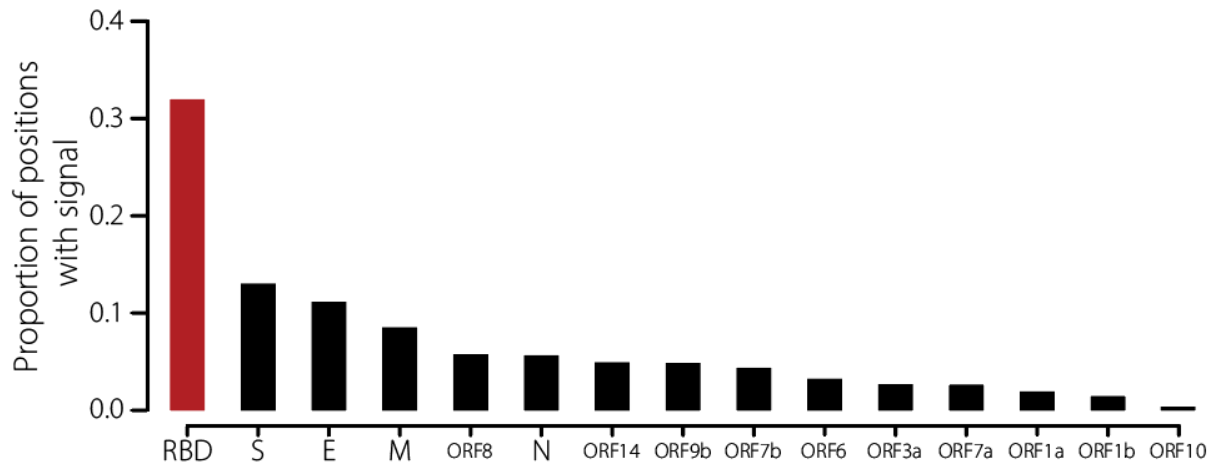

**Figure S11: Proportion of mutations that are defining the lineages of SARS-CoV-2 worldwide, by ORFs**

Additionally, to Figure 4E, we plot the proportion of amino acid substitutions that are lineage-defining within SARS-CoV-2 ORFs, and the Receptor Binding Domain (RBD).

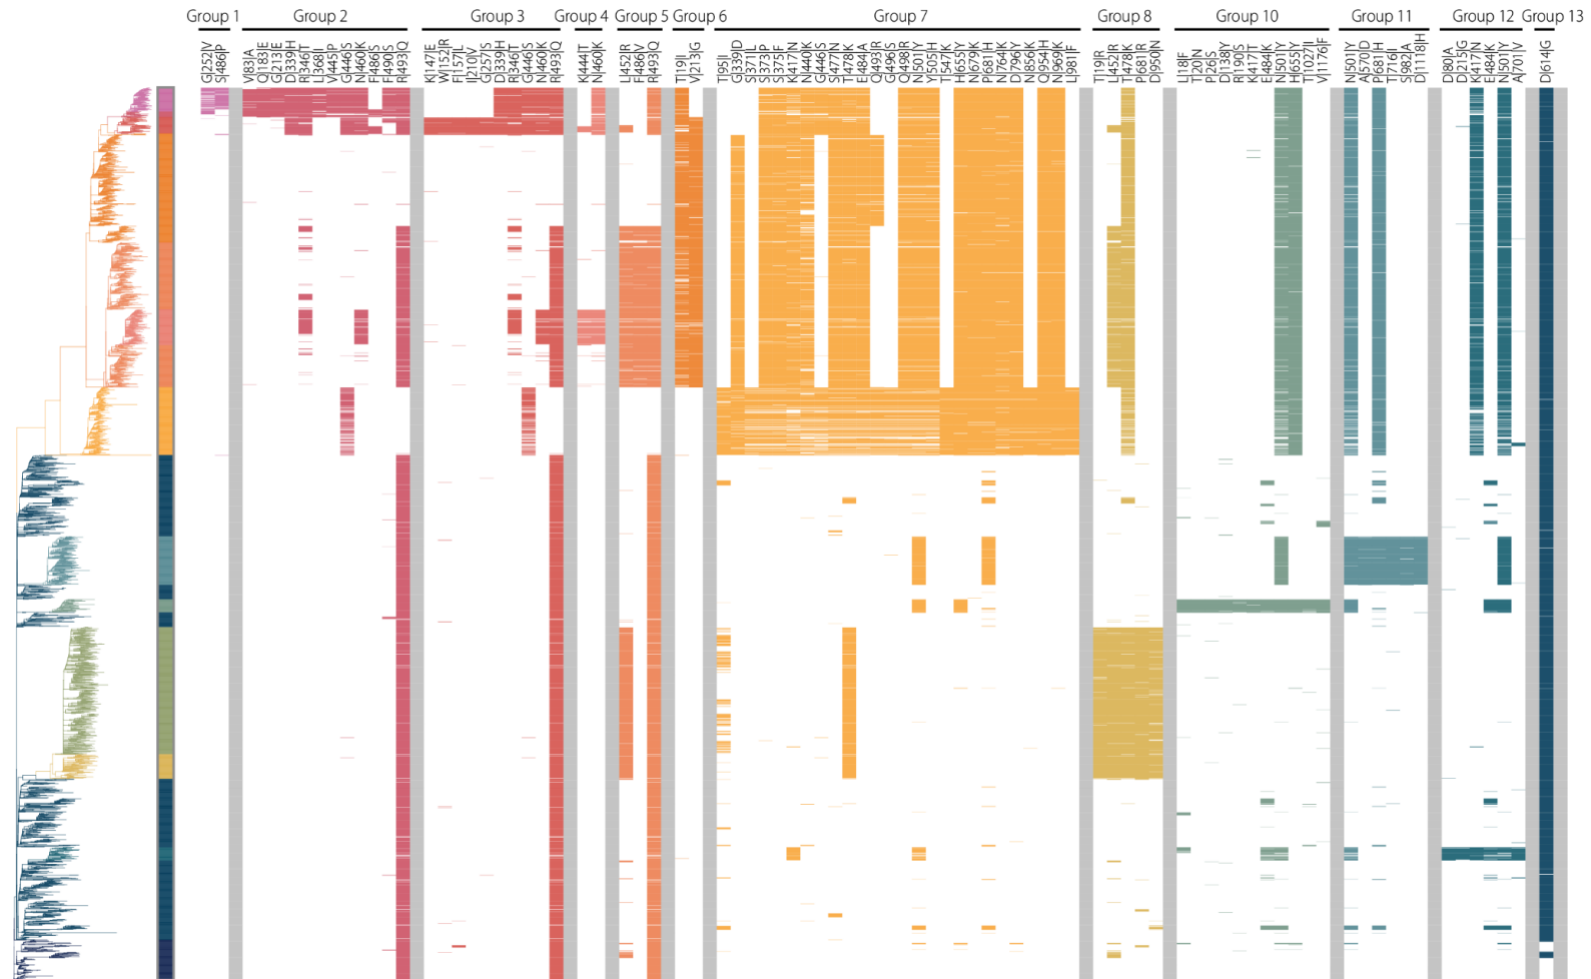

**Figure S12: Phylogenetic tree and mutations in the spike protein that are defining lineages in the global SARS-CoV-2 dataset**

We present the H3N2 time-resolved tree (left), together with the mutations that we found to be defining its lineages (right). Colors represent the different lineages. Each column on the right displays one mutation, with its name at the top. Colors denote isolates that are carrying the labeled mutation, white denotes the absence of that mutation (although isolates could have other mutations at this position). Some mutations (e.g., T478K or N501Y) are defining multiple lineages and are therefore plotted twice. The list of lineage-defining mutations can be found in Data File S5.

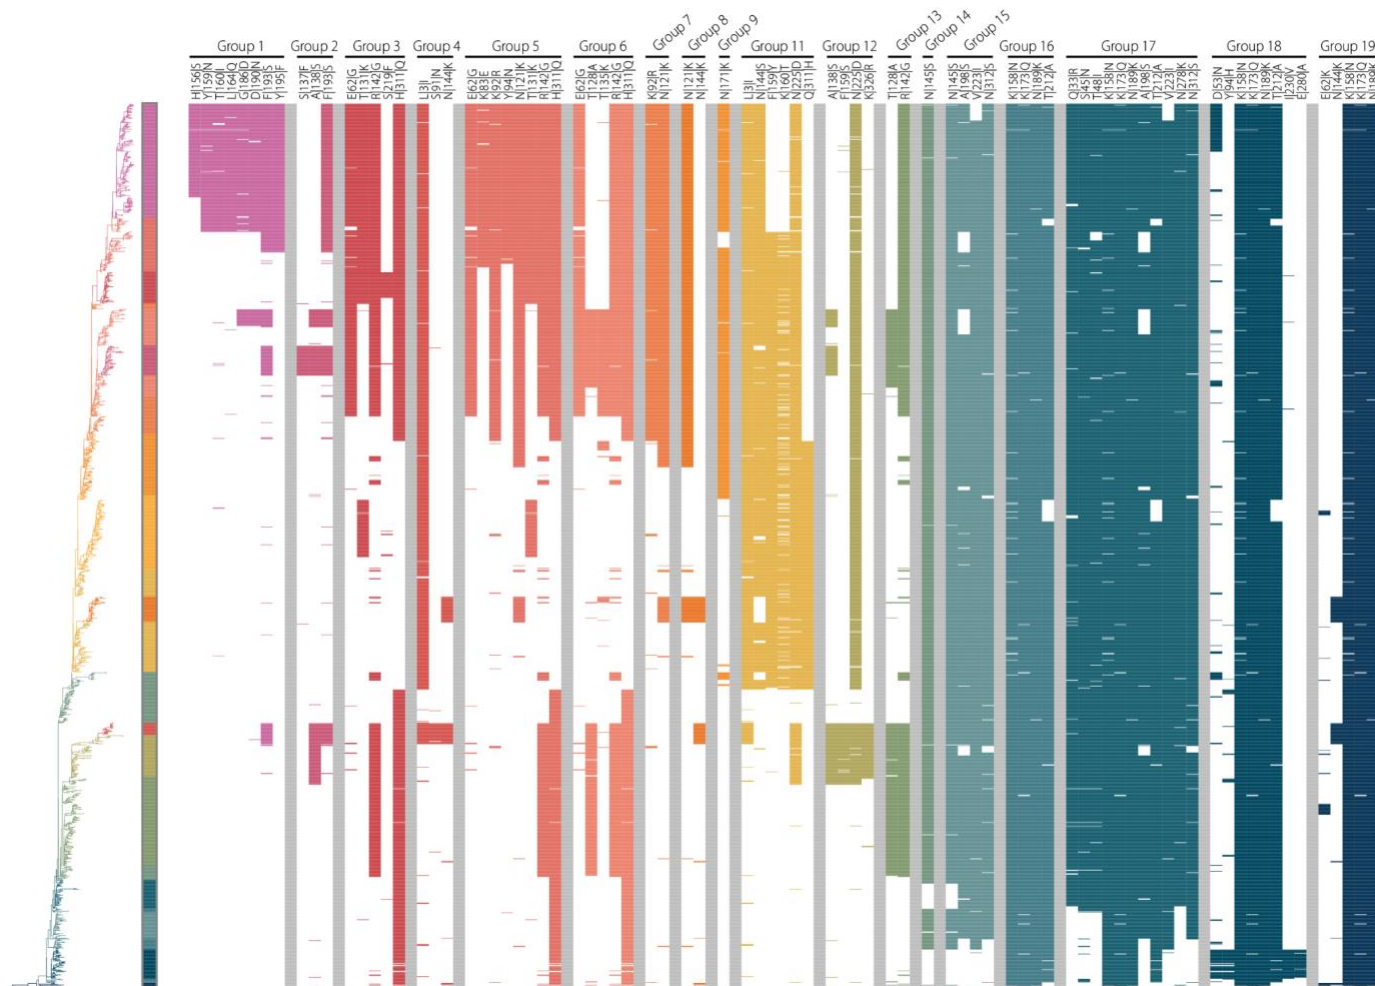

**Figure S13: Phylogenetic tree and mutations in the HA1 subunit that are defining lineages in the global H3N2 dataset**

We present the H3N2 time-resolved tree (left), together with the mutations that we found to be defining its lineages (right). Colors represent the different lineages. Each column on the right displays one mutation, with its name at the top. Colors denote isolates that are carrying the labeled mutation, white denotes the absence of that mutation (although isolates could have other mutations at this position). Some mutations (e.g., N144K or F193S) are defining multiple lineages and are therefore plotted twice. The list of lineage-defining mutations can be found in Data File S6.

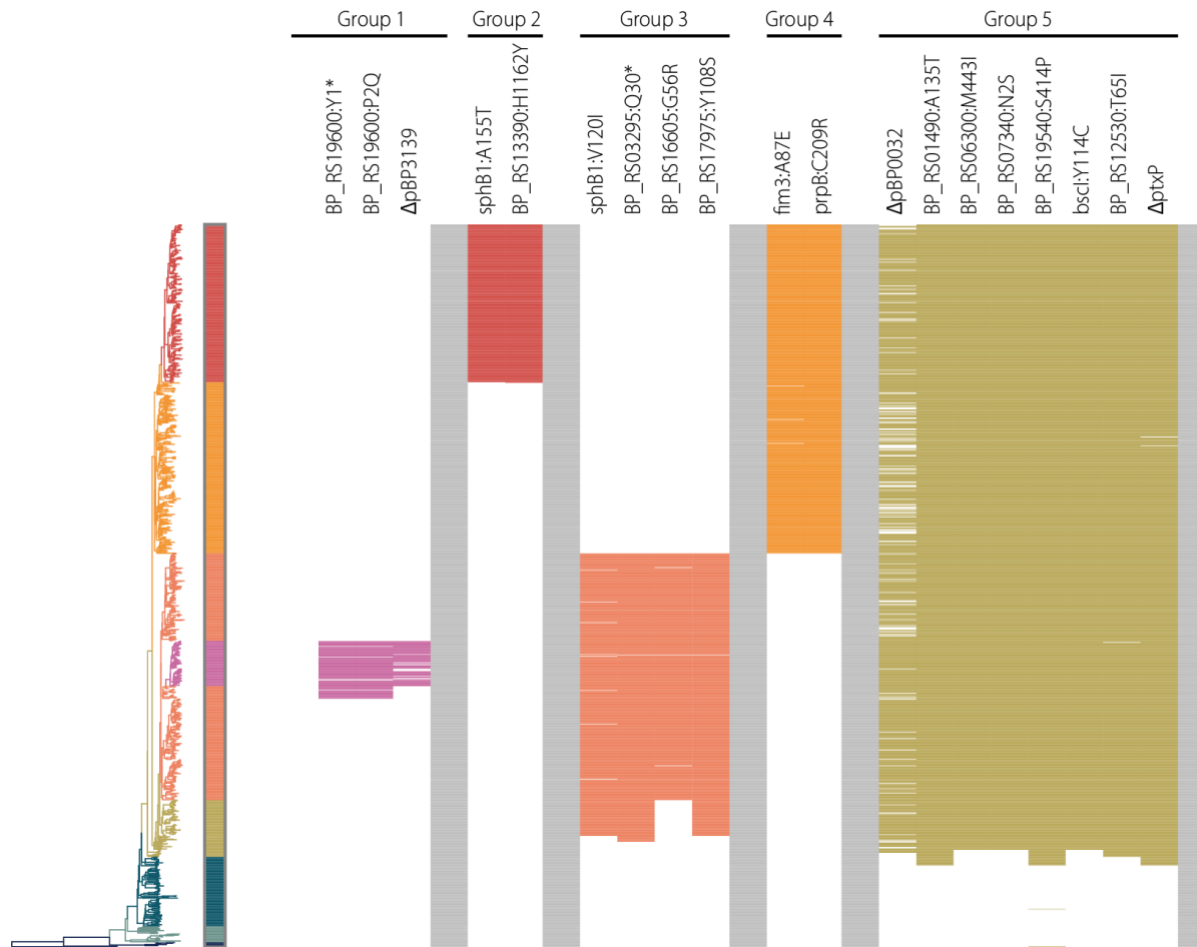

**Figure S14: Phylogenetic tree and mutations defining lineages in the *B. pertussis* dataset from in France**

We present the *B. pertussis* time-resolved tree (left), together with the mutations that we found to be defining its lineages (right). Colors represent the different lineages. Each column on the right displays one mutation, with its name at the top. Colors denote isolates that are carrying the labeled mutation, white denotes the absence of that mutation (although isolates could have other mutations at this position). The list of lineage-defining mutations can be found in Data File S7.

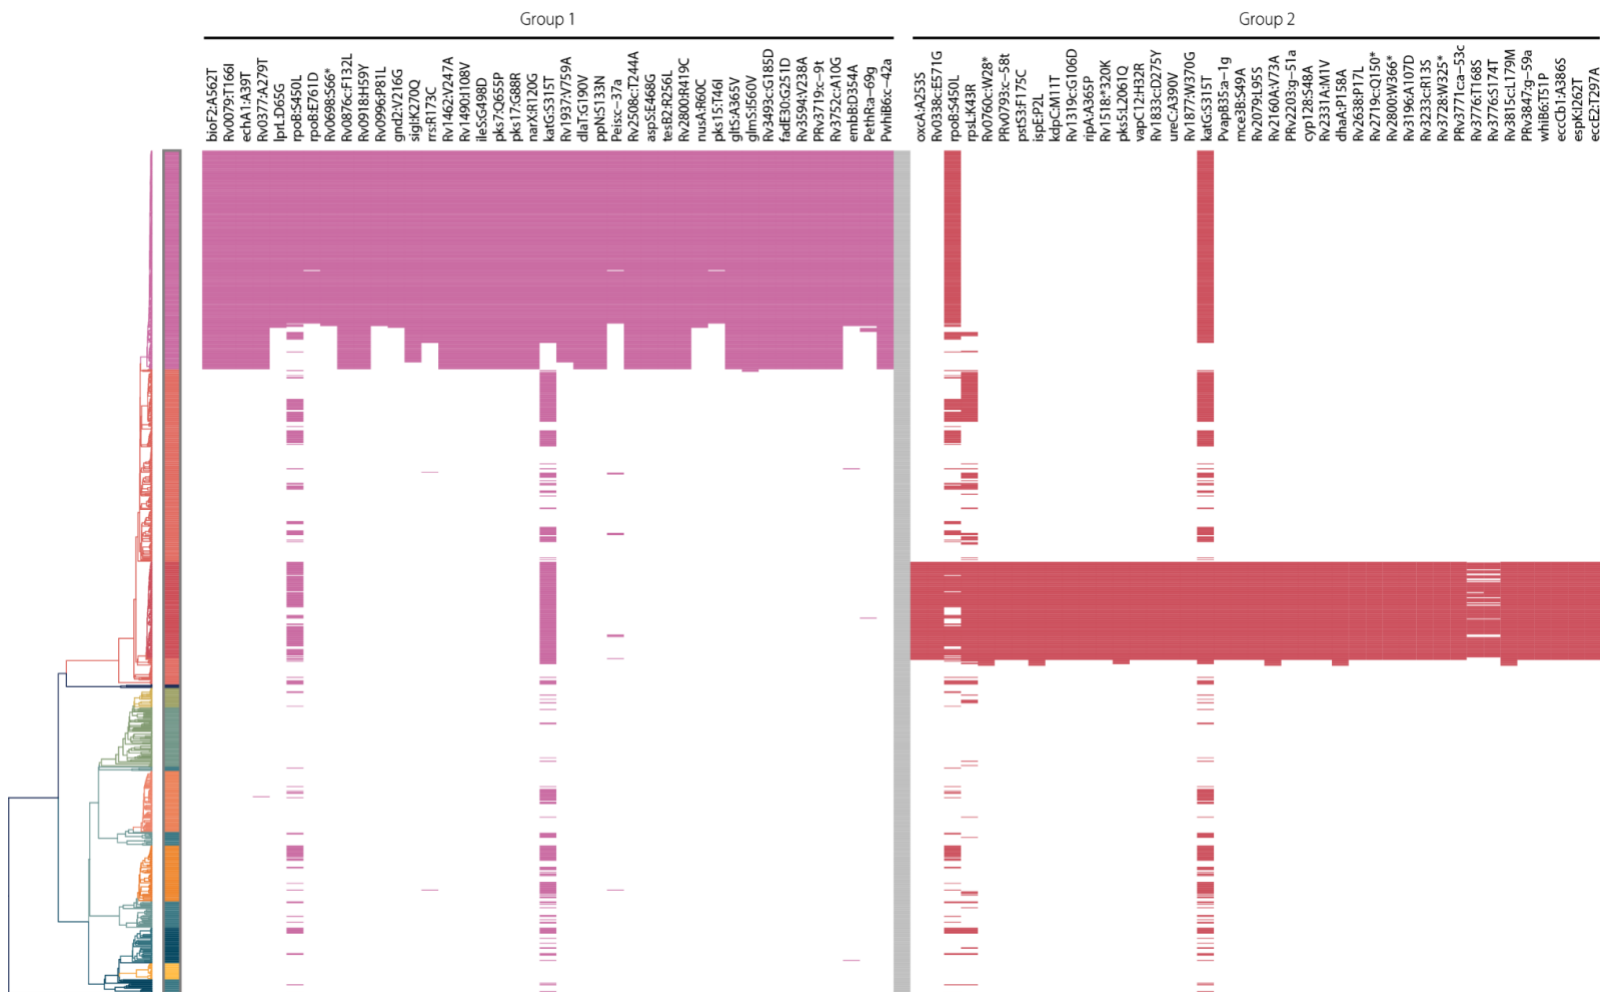

**Figure S15: Phylogenetic tree and mutations defining lineages 1 and 2 in the *M. tuberculosis* dataset from in Samara, Russia**

We present the *M. tuberculosis* time-resolved tree (left), together with the mutations that we found to be defining the lineages 1 and 2 (right). Colors represent the different lineages. Each column on the right displays one mutation, with its name at the top. Colors denote isolates that are carrying the labeled mutation, white denotes the absence of that mutation (although isolates could have other mutations at this position). Some mutations (e.g., rpoB:S450L or katG:S315T) are defining both lineages and are therefore plotted twice. The list of lineage-defining mutations can be found in Data File S8.

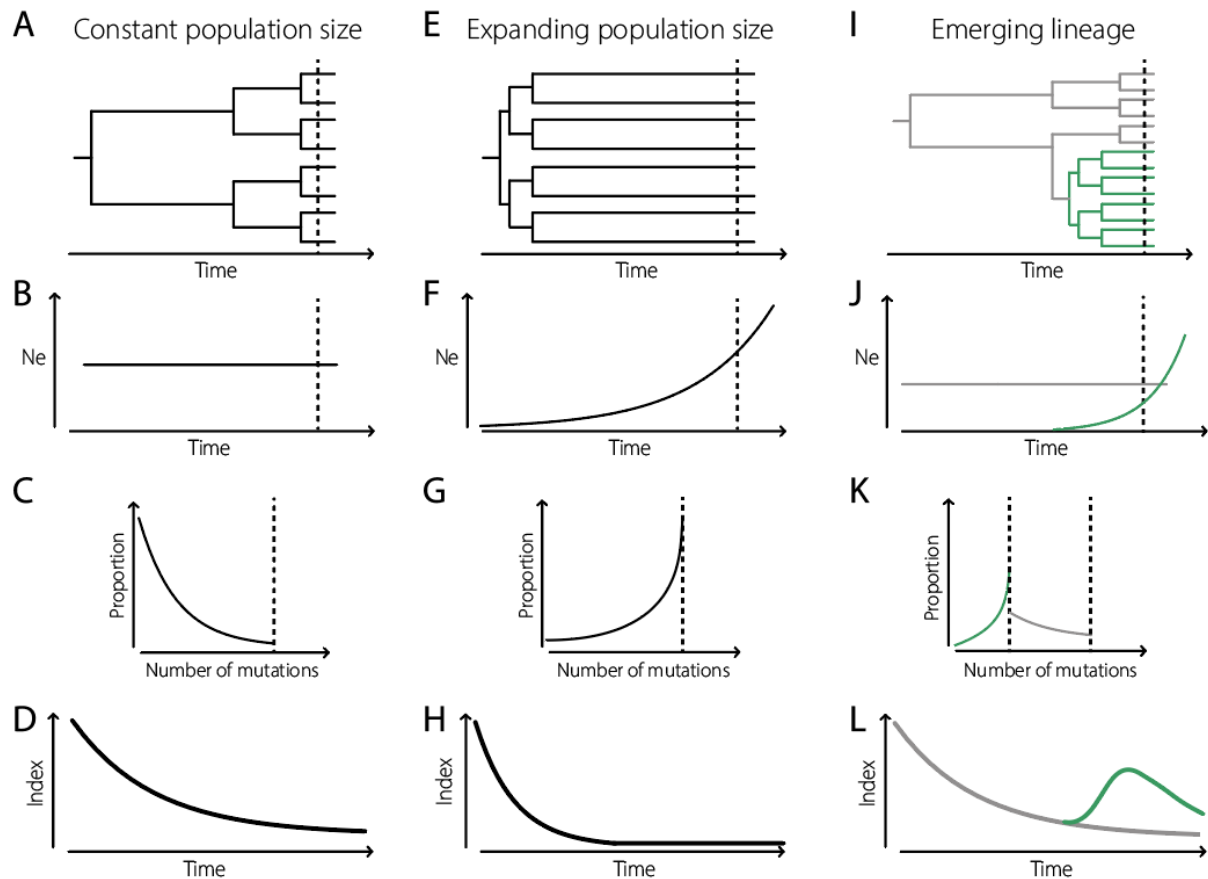

**Figure S16: Population history, pairwise distance distribution and index dynamics.**

**(A-D)** Constant effective population size. **(E-H)** Exponential population size. (A and B are inspired by Volz and colleagues, 2013(60)) **(I-L)** Case of an emerging, exponentially growing, lineage in a population of constant effective size.

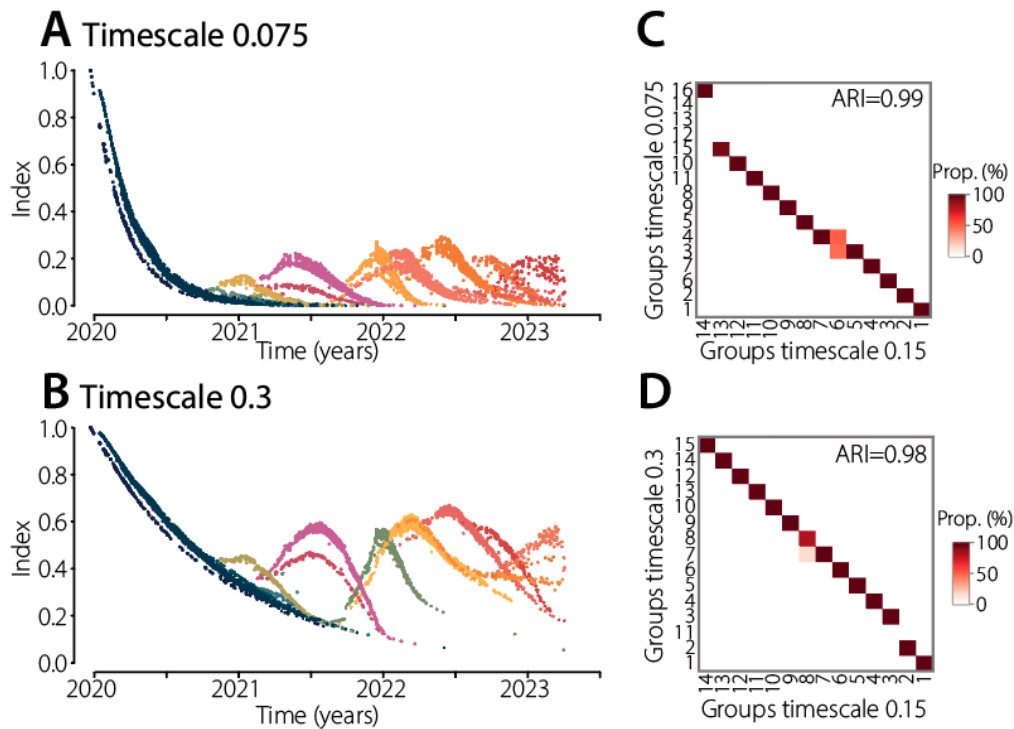

**Figure S17: Robustness of the framework to the choice of timescale**

We show our framework is robust to the choice of the timescale (governing the weight distribution used in the index computation). **(A-B)** Index dynamics computed on the global SARS-CoV-2 tree, with either a timescale of 0.075 (A) or 0.3 (B). The timescale used in the main analysis is 0.15. A smaller timescale focused more on recent population dynamics; a larger timescale focused more on the past evolution. Colors represent the lineages identified with our algorithm on those dynamics. **(C-D)** We compare the lineages identified with those timescales (y-axis) to the lineages presented throughout this study, with a timescale of 0.15 (x-axis). Darker colors represent more agreement between both classifications. Overall, we find minimal differences in the lineages detected.



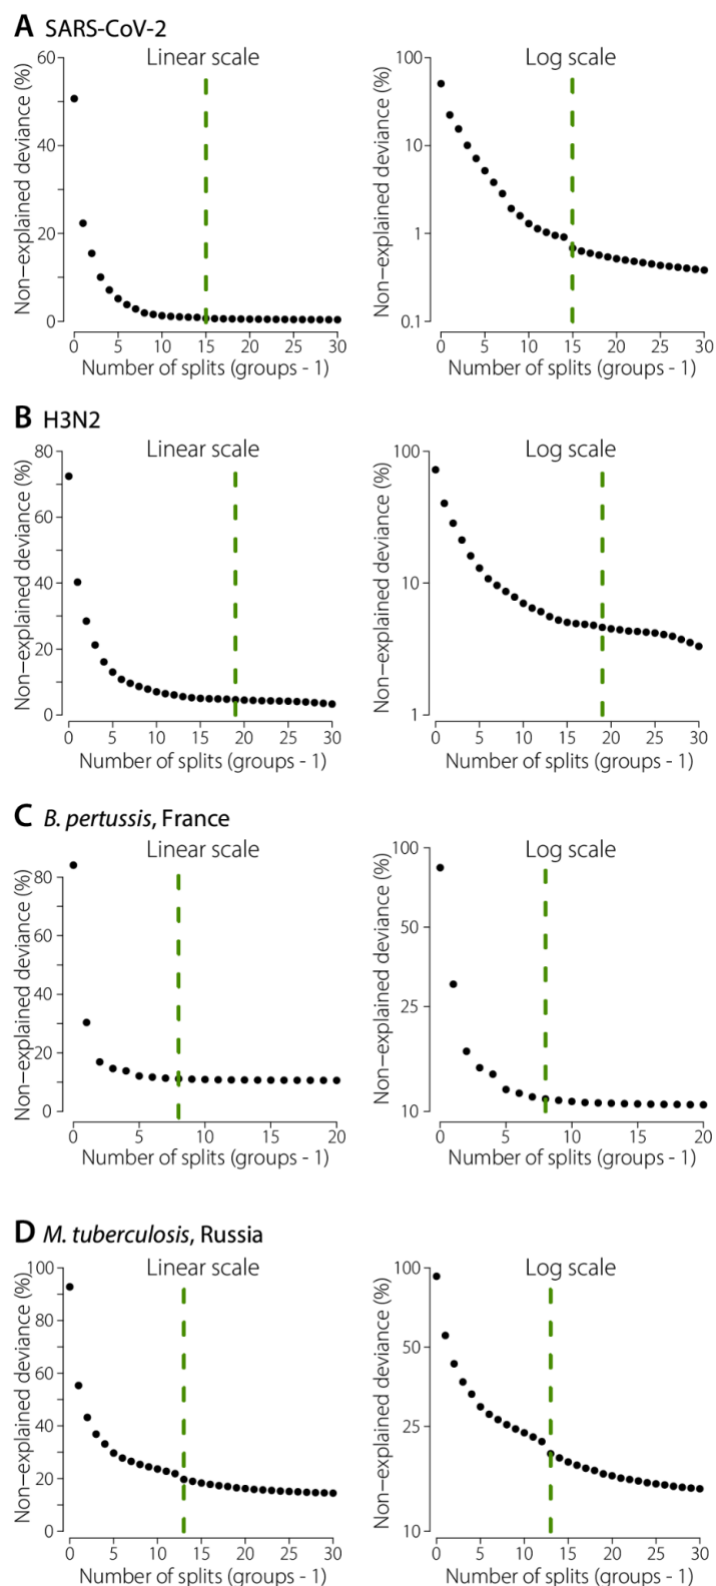

**Figure S18: Non-explained deviance as a function of the number of groups in the lineage detection algorithm.**

For each pathogen, we plot the proportion of non-explained deviance by the models with different numbers of groups. Dashed lines represent the number of groups chosen. We plot the proportion both on a linear scale (left) and log scale (right). The log scale enables a more precise appreciation of the number of groups at which the deviance explained does not increase substantially anymore.

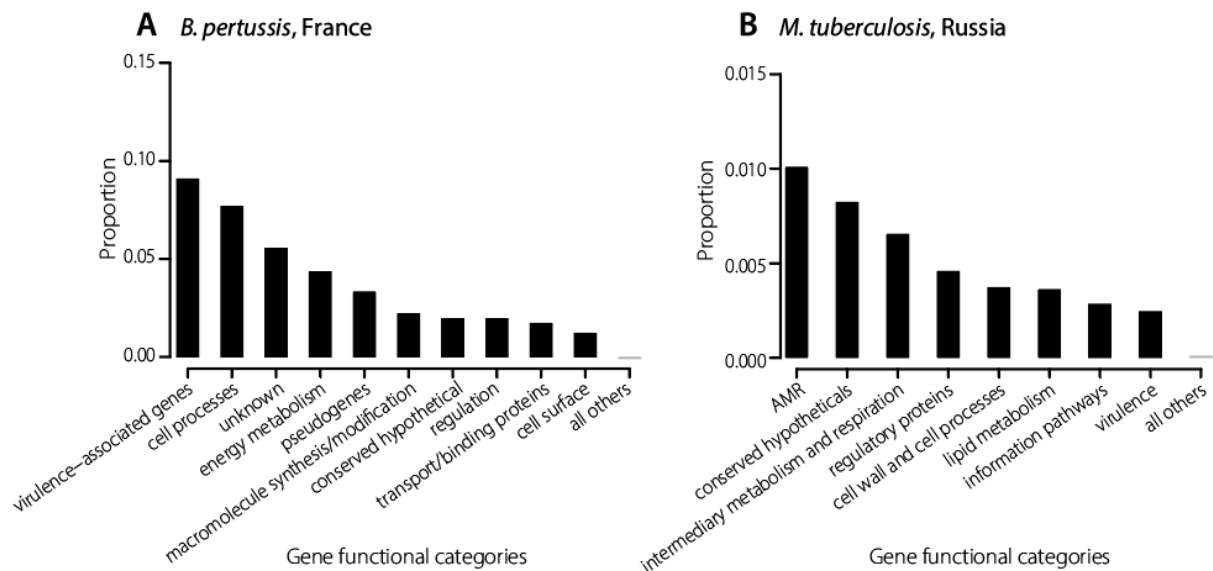

**Figure S19: Proportion of synonymous mutations that are lineage-defining, by gene functional categories, for *B. pertussis* and *M. tuberculosis***

Similarly to Figure 4K-L, we plot the proportion of synonymous mutations that are lineage-defining within each functional category, for (A) *B. pertussis* and (B) *M. tuberculosis* (36, 37). For *M. tuberculosis*, we only considered the most recent lineages 1 and 2. As expected, we find no statistical differences, as opposed to Figure 4K-L.

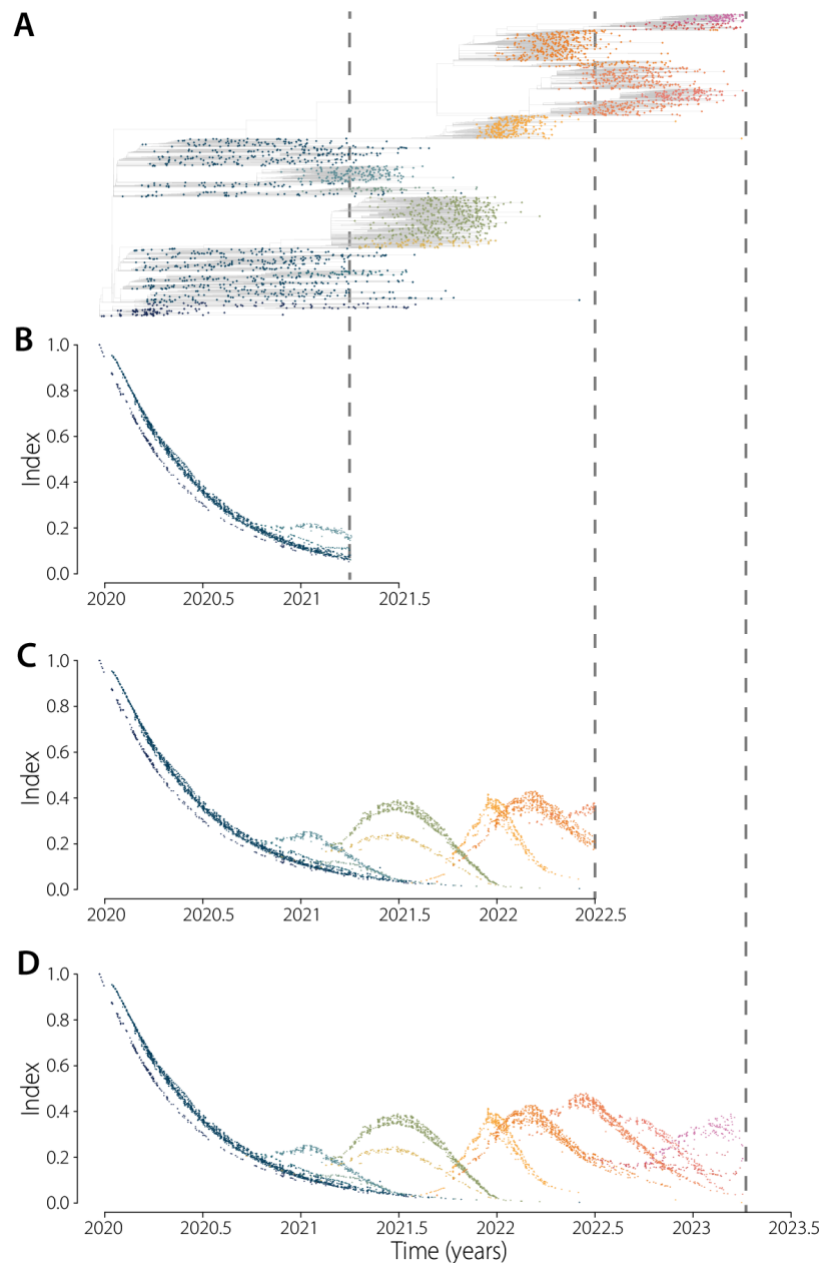

**Figure S20: Example of index dynamics on time censored global SARS-CoV-2 datasets**

**(A)** Global SARS-CoV-2 time-resolved phylogenetic tree, same as on Figures 1-2. Dots denote terminal nodes only. **(B-C)** Index computed on censored datasets, on either 2021.26 (B) or 2022.5 (C). **(D)** Uncensored index dynamics. When censoring a dataset, we prune all isolates not selected, effectively removing internal nodes and well as terminal nodes. This explains the slightly different dynamics observed near the censoring date. Colors represent the lineages automatically found by our framework (same as Figures 1-2).

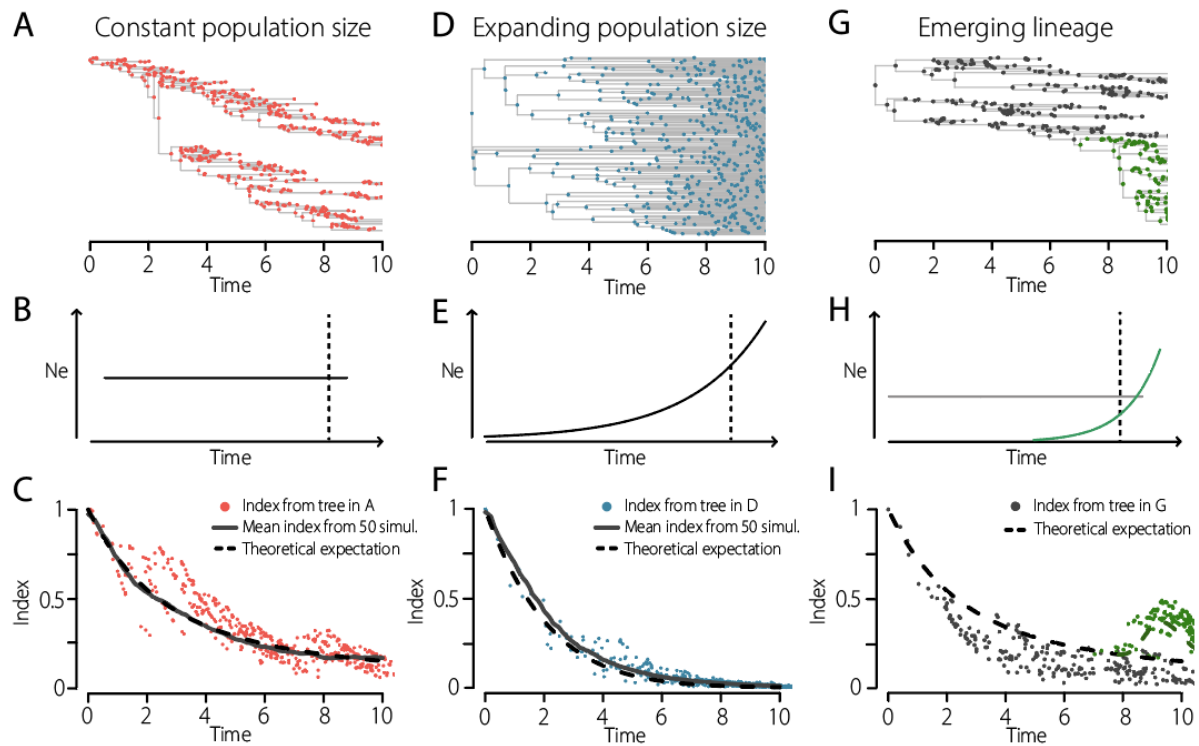

**Figure S21: Illustration of the index behavior in different population histories.**

Similarly to Figure S12, we illustrate here the behavior of the index. In each case, we simulate trees and compute the index on them. **(A-C)** Constant population size. Simulated time-resolved tree, under a birth-death model with equal probability of birth and death, i.e., constant population size on average. **(B)** Effective population size used in the simulation. **(C)** Index for through time. **(D-F)** Exponential population size. **(G-I)** Case of an emerging, exponentially growing, lineage in a population of constant effective size. Colors denote each simulation. Dashed lines: expected dynamics given equations in the Methods. Solid lines: mean over the 50 simulations.

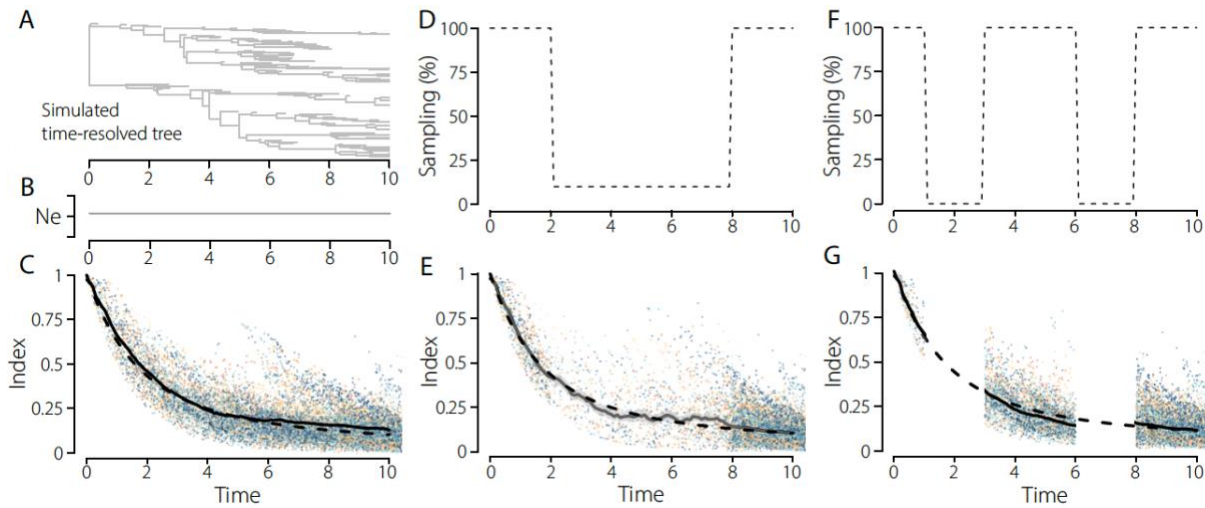

**Figure S22: Robustness to sampling schemes, from simulation study.**

We assess the robustness of the index computation to sampling intensity. **(A-C)** Simulations with no sampling bias. 50 simulations were performed. The tree in A represents one simulation. B represents the effective population size trend: constant. **(D-E)** For each simulation, only 10% of the sequences from year 2-8 were used to compute the index. **(F-G)** No sequences from years 1-3 or 6-8 were used to compute the index. In C, E and G, colors denote each simulation. Dashed lines: expected dynamics given equations in the Methods. Solid lines: mean over the 50 simulations, for the different sampling biases.
